# Supplementary material for: Machine-learning prediction of cancer survival: a retrospective study using electronic administrative records and a cancer registry
Source: PubMed Central journal article supplement — BMJ Open. 2014 Mar 15;4(3):e004007. doi: 10.1136/bmjopen-2013-004007 (PMC3963101; doi:10.1136/bmjopen-2013-004007), 2014-03-15
Supplement: bmjopen-2013-004007.draft_revisions.pdf [file bmjopen-2013-004007.draft_revisions.pdf]

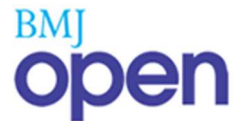

## Machine learning techniques enhance conventional methods in predicting clinical outcomes

|                                 |                                                                                                                                                                                                                                                                                                                                                                                                                                                                                                                                                                                                                                                                                                                                                                                                                                                                                                                                                                                |
|---------------------------------|--------------------------------------------------------------------------------------------------------------------------------------------------------------------------------------------------------------------------------------------------------------------------------------------------------------------------------------------------------------------------------------------------------------------------------------------------------------------------------------------------------------------------------------------------------------------------------------------------------------------------------------------------------------------------------------------------------------------------------------------------------------------------------------------------------------------------------------------------------------------------------------------------------------------------------------------------------------------------------|
| Journal:                        | <i>BMJ Open</i>                                                                                                                                                                                                                                                                                                                                                                                                                                                                                                                                                                                                                                                                                                                                                                                                                                                                                                                                                                |
| Manuscript ID:                  | bmjopen-2013-004007                                                                                                                                                                                                                                                                                                                                                                                                                                                                                                                                                                                                                                                                                                                                                                                                                                                                                                                                                            |
| Article Type:                   | Research                                                                                                                                                                                                                                                                                                                                                                                                                                                                                                                                                                                                                                                                                                                                                                                                                                                                                                                                                                       |
| Date Submitted by the Author:   | 13-Sep-2013                                                                                                                                                                                                                                                                                                                                                                                                                                                                                                                                                                                                                                                                                                                                                                                                                                                                                                                                                                    |
| Complete List of Authors:       | Gupta, Sunil; Deakin University, Centre for Pattern Recognition and Data Analytics<br>Tran, Truyen; Deakin University, Centre for Pattern Recognition and Data Analytics<br>Luo, Wei; Deakin University, Centre for Pattern Recognition and Data Analytics<br>Phung, Dinh; Deakin University, Centre for Pattern Recognition and Data Analytics<br>Kennedy, Richard; Deakin University, School of Medicine<br>Broad, Adam; Barwon Health, Andrew Love Cancer Centre<br>Campbell, David; Barwon Health, Andrew Love Cancer Centre<br>Kipp, David; Barwon Health, Andrew Love Cancer Centre<br>Singh, Madhu; Barwon Health, Andrew Love Cancer Centre<br>Khasraw, Mustafa; Barwon Health, Andrew Love Cancer Centre<br>Matheson, Leigh; Barwon Southwest Integrated Cancer Service,<br>Ashley, David; Barwon Health, Andrew Love Cancer Centre; Deakin University, School of Medicine<br>Venkatesh, Svetha; Deakin University, Centre for Pattern Recognition and Data Analytics |
| <b>Primary Subject Heading</b>: | Oncology                                                                                                                                                                                                                                                                                                                                                                                                                                                                                                                                                                                                                                                                                                                                                                                                                                                                                                                                                                       |
| Secondary Subject Heading:      | Health informatics                                                                                                                                                                                                                                                                                                                                                                                                                                                                                                                                                                                                                                                                                                                                                                                                                                                                                                                                                             |
| Keywords:                       | Cancer, Survival, Prediction, Machine Learning, Electronic Medical Record                                                                                                                                                                                                                                                                                                                                                                                                                                                                                                                                                                                                                                                                                                                                                                                                                                                                                                      |
|                                 |                                                                                                                                                                                                                                                                                                                                                                                                                                                                                                                                                                                                                                                                                                                                                                                                                                                                                                                                                                                |

SCHOLARONE™  
Manuscripts

1  
2  
3 Machine learning techniques enhance conventional methods in  
4  
5  
6 predicting clinical outcomes  
7  
8  
9  
10

11 Sunil Gupta<sup>1</sup>, Truyen Tran<sup>1,2</sup>, Wei Luo<sup>1</sup>, Dinh Phung<sup>1</sup>, Richard Lee Kennedy<sup>3</sup>, Adam Broad<sup>4</sup>,  
12 David Campbell<sup>4</sup>, David Kipp<sup>4</sup>, Madhu Singh<sup>4</sup>, Mustafa Khasraw<sup>3,4</sup>, Leigh Matheson<sup>5</sup>, David  
13 M Ashley<sup>3,4,5</sup>, Svetha Venkatesh<sup>1\*</sup>  
14  
15  
16  
17  
18  
19

20 <sup>1</sup>Centre for Pattern Recognition and Data Analytics, Deakin University, Geelong, Victoria,  
21 Australia  
22  
23

24 <sup>2</sup>Department of Computing, Curtin University, Perth, Western Australia, Australia  
25  
26  
27

28 <sup>3</sup>School of Medicine, Deakin University, Geelong, Victoria, Australia  
29  
30

31 <sup>4</sup>Andrew Love Cancer Centre, Barwon Health, Geelong, Victoria, Australia  
32  
33

34 <sup>5</sup>Barwon Southwest Integrated Cancer Service, Geelong, Victoria, Australia  
35  
36

37 \*Correspondence to: Svetha Venkatesh, Centre for Pattern Recognition and Data Analytics,  
38

39 Deakin University, Geelong, Victoria, Australia 3220 [svetha.venkatesh@deakin.edu.au](mailto:svetha.venkatesh@deakin.edu.au)  
40

41 Telephone: +61 3 5227 2905 Fax: +61 3 5227 2028  
42  
43

44 Total Number of Text Pages: 24  
45

46 Total Number of Tables: 6  
47

48 Total Number of Illustrations: 0  
49  
50  
51  
52  
53  
54  
55  
56  
57  
58  
59  
60

1  
2  
3 Acknowledgements: The authors have no financial disclosures, conflicts of interest, or  
4  
5 external funding sources to claim.  
6

7 Abstract word count: 293  
8

9  
10 Word count: 4,680  
11

12  
13  
14  
15  
16 *Keywords: Cancer; Survival; Prediction; Machine learning; Electronic medical record*  
17  
18  
19  
20  
21  
22  
23  
24  
25  
26  
27  
28  
29  
30  
31  
32  
33  
34  
35  
36  
37  
38  
39  
40  
41  
42  
43  
44  
45  
46  
47  
48  
49  
50  
51  
52  
53  
54  
55  
56  
57  
58  
59  
60

**Abstract**

*Objectives:* Using the prediction of cancer outcome as a model, we have tested the hypothesis that through analysing routinely collected digital data contained in an electronic administrative record (EAR), using machine learning techniques, we could enhance conventional methods in predicting clinical outcomes.

*Setting:* A regional cancer centre in Australia.

*Participants:* Disease specific data from a purpose built cancer registry (ECO) from 869 patients was used to predict survival at 6, 12, and 24 months. The model was validated with data from a further 94 patients, and results compared to assessment of five specialist oncologists. Machine-learning prediction using ECO data was compared with that using EAR and a model combining ECO and EAR data.

*Primary and secondary outcome measures:* Survival prediction accuracy in terms of the area of the ROC curve.

*Results:* The ECO model yielded AUCs of 0·87 (95% CI=0·848–0·890) at six months, 0·796 (95% CI=0·774–0·823) at 12 months, and 0·764 (95% CI=0·737–0·789) at 24 months. Each was slightly better than the performance of the clinician panel. The model performed consistently across a range of cancers, including rare cancers. Combining ECO and EAR data yielded better prediction than the ECO-based model (AUCs ranging from 0·757 to 0·997 for 6 months, AUCs from 0·689 to 0·988 for 12 months, and AUCS from 0·713 to 0·973 for 24

1  
2  
3 months). The best prediction was for genitourinary, head and neck, lung, skin and upper  
4  
5 gastrointestinal tumours.  
6  
7

8  
9 *Conclusion:* Machine learning applied to information from a disease specific (cancer)  
10  
11 database and the EAR can be used to predict clinical outcomes. Importantly, the approach  
12  
13 described made use of a digital data that is already routinely collected but under-exploited  
14  
15 by clinical health systems.  
16  
17  
18  
19  
20  
21  
22  
23  
24  
25  
26  
27  
28  
29  
30  
31  
32  
33  
34  
35  
36  
37  
38  
39  
40  
41  
42  
43  
44  
45  
46  
47  
48  
49  
50  
51  
52  
53  
54  
55  
56  
57  
58  
59  
60

1  
2  
3 ***Strengths and limitations of this study***  
4

- 5 • This is the first study using machine learning of both administrative and registry data for  
6 cancer survival prediction.  
7
- 8 • A single prognosis model is produced across all cancers, improving prediction accuracy  
9 on rare cancers.  
10
- 11 • This is a retrospective study in a single centre.  
12  
13  
14  
15  
16  
17  
18  
19  
20  
21  
22  
23  
24  
25  
26  
27  
28  
29  
30  
31  
32  
33  
34  
35  
36  
37  
38  
39  
40  
41  
42  
43  
44  
45  
46  
47  
48  
49  
50  
51  
52  
53  
54  
55  
56  
57  
58  
59  
60

## Introduction

Over the past two decades there has been an explosion in the use of digital footprints to monitor and predict human behaviours. The source of data used for this purpose is our on-line use of the internet, the emails we send and transactions we make. Analysis of these footprints through machine learning techniques (MLT) have been exploited in the public domain by government and business to predict behaviours and inform investment decisions. In research MLT have also been used to analyse gene expression data,<sup>15, 23</sup> and for medical image analysis,<sup>24, 25</sup>. However, to date, there has been little exploration of these methodologies in the clinical setting. We hypothesised that MLT may offer a paradigm shift in clinical medicine that can address core issues with large and complex datasets. These techniques offer the potential to derive adaptive systems from diverse datasets, discover latent connections between data items, and to predict outcomes.

Most hospitals routinely collect large digital electronic administrative records (EAR). These are primarily used for organisational financial management. Historically, they have not been used extensively for clinical or research purposes. If these large data sets are able to be exploited using MLT it may open the way to optimise the use of collected administrative data to assist in predicting patients outcome, planning individualised patient care, monitoring resource utilisation, and improving institutional performance.<sup>8, 9</sup> The accurate assessment of comorbid status would improve assessment of prognosis and guide treatment decisions.<sup>10-13</sup> Other important information that may be contained or inferred

1  
2  
3 from an EAR includes geographical and demographic data, socioeconomic status, and  
4  
5 history of health care facility utilisation.<sup>14-16</sup>  
6  
7

8  
9 In this study, using cancer outcome prediction as a model, we wished to test the hypothesis  
10  
11 that routinely collected digital health data, if analysed by state of the art, validated, machine  
12  
13 learning techniques could be used to assist conventional tools in predicting clinical  
14  
15 outcomes.  
16

17  
18  
19 Accurate prediction of survival in patients with cancer remains a challenge due to the ever-  
20  
21 increasing heterogeneity and complexity of cancer, treatment options, and patient  
22  
23 populations. If achieved, reliable predictions could assist personalised care and treatment,  
24  
25 and improve institutional performance in cancer management. In current practice clinicians  
26  
27 use data collected at the bedside in consultations, medical records or purpose built cancer  
28  
29 registries to aid prognostication and decision making.  
30  
31

32  
33  
34 The notion of using MLT to predict cancer prognosis from clinical and pathological data is  
35  
36 not a new one.<sup>1,2</sup> However, with the advent of more sophisticated and better validated  
37  
38 techniques, not only is more accurate prediction possible, but the range of data  
39  
40 incorporated into decision aids can be increased.<sup>3-5</sup> The need to improve cancer care  
41  
42 systems by creating linkages between registries and epidemiological surveillance through  
43  
44 analysis of complex and large clinical databases has recently been highlighted.<sup>6,7</sup>  
45  
46  
47

48  
49 In this study we tested the capability of MLT to predict patient outcomes in a  
50  
51 heterogeneous cohort of cancer patients. We have interrogated two data sets: the first a  
52  
53



1  
2  
3 purpose-built cancer specific registry (ECO) containing demographic and tumour-related  
4  
5 data items according to an Australian nationally agreed protocol; the second a hospital  
6  
7 digital data set containing information about the patient's previous admissions and  
8  
9 presentations (EAR). Finally, in a test group of 94 patients, we examined the performance of  
10  
11 machine-learning methods in aiding a panel of expert clinicians in predicting patient  
12  
13 survival.  
14  
15  
16  
17  
18  
19  
20  
21  
22  
23  
24  
25  
26  
27  
28  
29  
30  
31  
32  
33  
34  
35  
36  
37  
38  
39  
40  
41  
42  
43  
44  
45  
46  
47  
48  
49  
50  
51  
52  
53  
54  
55  
56  
57  
58  
59  
60

For peer review only

## ***Patients and Methods***

### *Study design*

This is a retrospective study using the electronic administrative record (EAR) and a specialised cancer registry (ECO) from Barwon Health, the only public tertiary institution in a region of Australia with more than 350,000 residents. With a unified hospital identity number in use across the region, Barwon Health's EAR provides a single point of access for information on patient encounters with the health system, including hospitalizations, ED visits, medications, and treatments. In addition, the Andrew Love Cancer Centre at Barwon health has a specialised cancer registry called ECO, which captures clinical data for patients in the region. ECO records information on demographics, primary tumour and metastatic tumour, cancer stage, tumour size, lymph nodes, and breast tumour specific information. Treatment type, outcomes, including death, and recurrence information (primary and metastatic) are also recorded. Table 1 shows the variables used for survival prediction. The cohort for this study consists of 963 patients identified in ECO who were first diagnosed in year 2009. Among these patients, 736 patients also had records in the EAR. Ethics approval was obtained from the Hospital and Research Ethics Committee at Barwon Health (number 12/83). Deakin University has reciprocal ethics authorization with Barwon Health.

### ***Analyses***

The analyses centred on predicting cancer survival since the date of diagnosis, defined as the date of tumour resection. Each patient was a unit of observation in the predictive problem: Patient data collected prior to the diagnosis date were used to construct the

1  
2  
3 independent variables; Survival status in a period following the assessment was the  
4  
5 dependent variable. Two analyses were performed: The first compared survival prediction  
6  
7 made by machine learning models and the clinician panel, based on only information from  
8  
9 ECO. The second analysis evaluated the added discriminative power provided by EAR, by  
10  
11 comparing the best machine learning models using three sets of predicting variables:  
12  
13 variables from ECO (Table 1), variables from EAR (appendix), and the union of the two.  
14  
15  
16

### 17 18 *Comparing predictions by machine learning models and clinician*

19  
20 In the first analysis, all 963 patients in the ECO registry were randomly divided into a  
21  
22 derivation cohort of 869 patients and a validation cohort of 94 patients (Table 2). To collect  
23  
24 clinician prediction, patients in the validation cohort were assigned to a panel of five  
25  
26 oncologists for survival prediction. For each patient, the oncologist was asked to estimate  
27  
28 the survival probabilities based on the independent variables in Table 1. All clinicians  
29  
30 estimated the patient's survival status by producing a probability for each of the three time  
31  
32 periods—6 months, 1 year, and 2 years. When making this assessment the clinicians did not  
33  
34 have knowledge of the treatment type offered or given to the patient. Three machine-  
35  
36 learning models were trained on the derivation cohort using the same set of independent  
37  
38 variables, one for each prediction period. Each of the machine learning models was an  
39  
40 ensemble of 400 support vector machines<sup>17</sup> with linear kernel (i.e., the output of the model  
41  
42 was the average of 400 support-vector-machine outputs). Each of the support vector  
43  
44 machines was trained using a random 80% subsampling (without replacement) of the  
45  
46 derivation cohort.<sup>18</sup> Two measures were taken to improve the training process. First, to  
47  
48  
49  
50  
51  
52  
53  
54  
55  
56  
57  
58  
59  
60

1  
2  
3 compensate for the imbalance between the two outcomes (there were more survivals than  
4  
5 deaths), we oversampled the non-surviving cases by 50% in each training subsample. Next,  
6  
7 variable selection was performed through fitting a generalized linear model with elastic net  
8  
9 regularization<sup>19</sup> (alpha parameter set to 0.1 and lambda parameter selected using 5-fold  
10  
11 internal cross-validation) and variables with zero coefficients were removed. After the  
12  
13 machine learning models were constructed, they were applied to predict survival  
14  
15 probabilities for each patient in the validation cohort. Both the clinician and model  
16  
17 predictions were validated with the actual outcomes in the ECO registry. Prediction  
18  
19 performance was measured using the area under the ROC curve (AUC), also known as the C-  
20  
21 statistic.<sup>20</sup> 95% confidence intervals of AUCs were computed using 1000 bootstrap samples  
22  
23 of validation cohort.  
24  
25  
26  
27  
28  
29

#### 30 *Comparing discriminative information from specialized registry and routine data*

31  
32 The second analysis compared the discriminative power of two data sources (ECO and EAR).  
33  
34 In this analysis, clinician predictions were not solicited. Among the 869 patients in the  
35  
36 derivation subset of Cohort 1, only 664 have records in the EAR and these patients were  
37  
38 included in the second analysis (Cohort 2, Table 2). Survival prediction models were derived  
39  
40 based on three sets of independent variables: 1) independent variables from EAR (EAR  
41  
42 only); 2) independent variables from ECO (ECO only); 3) the union of the two sets (*EAR +*  
43  
44 *ECO*). Similar to the previous analysis, the models were trained using random 80%  
45  
46 subsamples and the modelling process was identical. However, the models were evaluated  
47  
48  
49  
50  
51  
52  
53  
54  
55  
56  
57  
58  
59  
60

1  
2  
3 not using the validation cohort. Instead, for each 80% subsample, the remaining 20% was  
4  
5 used to compute the AUC and its 95% confidence interval.  
6  
7

8  
9 The Wilcoxon rank-sum test was applied to answer the following comparison problems:

- 10  
11 1. Does *ECO only* provide more discriminative power than *EAR only*?
- 12  
13 2. Does *EAR + ECO* provide more discriminative power than *EAR only*?
- 14  
15 3. Does *EAR + ECO* provide more discriminative power than *ECO only*?
- 16  
17  
18

19  
20 Details of the machine learning model and the predictor variables can be found in the

21  
22 Appendix.  
23  
24  
25  
26

### 27 **Results**

28  
29 The cohorts for the two analyses are summarized in Table 2. The comparison between the  
30  
31 algorithmic predictions and the clinician predictions are summarized in Table 3. The model  
32  
33 had comparable performance to that of the clinicians, with the performance of the machine  
34  
35 learning model marginally better (AUC ranging from 0·76 to 0·87) than that of the clinicians  
36  
37 (AUC ranging from 0·75 to 0·79) for all three prediction periods. This similarity in accuracy  
38  
39 between algorithmic predictions and the clinician predictions was observed across different  
40  
41 cancer types. Consider the predictions for six-month survival. Out of 15 breast cancer cases,  
42  
43 the clinicians made 15 correct predictions and the algorithm made 14; Out of 18 lung cancer  
44  
45 cases, the clinicians made 13 correct predictions and the algorithm made 14; Out of 7  
46  
47 haematological cases, both the clinicians and the algorithm made all predictions correctly.  
48  
49  
50  
51  
52  
53  
54  
55  
56  
57  
58  
59  
60

1  
2  
3 Similar results were observed on 12-month and 24-month survival predictions for different  
4  
5 cancers.  
6  
7

8  
9 Prediction of 6-month survival using the three models is shown in Table 4. There were no  
10  
11 deaths from breast cancer during this period. Comparing the ECO model with the EAR  
12  
13 model, AUCs were comparable for colorectal, genitourinary, haematological, head and neck  
14  
15 and skin tumours. The EAR model was significantly better ( $p < 0.05$ ) for rare tumours; CNS,  
16  
17 upper gastrointestinal and unassigned primary source tumours. For each tumour type, the  
18  
19 model using both ECO and EAR data yielded similar or better performance to the models  
20  
21 using information from only one of the two databases. AUCs for the combined model  
22  
23 ranged from 0.76 to 1.0. The combined data model showed particularly improved  
24  
25 performance over ECO data ( $p$  value  $< 0.05$ ) for all tumour streams except and breast and CNS  
26  
27 tumours.  
28  
29  
30  
31  
32

33 Data for 12-month survival prediction is shown in Table 5. Cancer-specific ECO data yielded  
34  
35 better prediction than EAR data ( $p < 0.05$ ) for gynaecological, haematological lung, skin and  
36  
37 unknown primary cancers. Otherwise, ECO and EAR models yielded generally similar results.  
38  
39 The model using combined data performed better than EAR ( $p$  value  $< .05$ ) for all tumour  
40  
41 streams other than CNS, head and neck and upper gastro tumours. The model using  
42  
43 combined data was better than ( $P < 0.05$ ) ECO for all cancers except breast, CNS,  
44  
45 gynaecological and haematological cancers.  
46  
47  
48  
49  
50  
51  
52  
53  
54  
55  
56  
57  
58  
59  
60

1  
2  
3 Table 6 shows data for 24-month survival prediction by the three models. The ECO model  
4  
5 yielded superior prediction ( $p$  value  $< .05$ ) to the EAR model for breast, genitourinary,  
6  
7 gynaecological, lung, skin and unknown primary cancers, while the EAR model was superior  
8  
9 to the ECO model for haematological and head and neck tumours. Once more the model  
10  
11 that performed the best was that derived from both ECO and EAR data with AUCs ranging  
12  
13 from 0.71 to 0.97 across the range of cancers and particularly enhanced performance for all  
14  
15 cancers except breast, colorectal, gynaecological and unknown primary tumours compared  
16  
17 to the ECO. In summary, over all time periods, the performance of the combined model was  
18  
19 better than ECO ( $p < 0.05$ ) for genitourinary, head and neck, lung, skin and upper  
20  
21 gastrointestinal tumours.  
22  
23  
24  
25  
26  
27  
28  
29  
30  
31  
32  
33  
34  
35  
36  
37  
38  
39  
40  
41  
42  
43  
44  
45  
46  
47  
48  
49  
50  
51  
52  
53  
54  
55  
56  
57  
58  
59  
60

### *Discussion*

In this study, using cancer outcome prediction as a model, we wished to test the hypothesis that routinely collected digital health data, if analysed by MLT, could be used to assist conventional tools in predicting clinical outcomes.

Applying machine learning to data from the electronic administrative record (EAR) alone predicted clinical outcomes with reasonable accuracy. Using the purpose built ECO data set, the predictive tool also performed well across a broad range of cancer types, and in both cases the predictive accuracies were at least as good as that of a panel of five expert clinicians. Importantly a predictive tool derived from both the purpose built clinical registry and administrative data had even greater predictive ability.

The wealth of administrative data contained in the EAR includes information on comorbid conditions and previous clinic and hospital attendances as well as a drug history. There is considerable potential to use this data to improve clinical care across a spectrum of diseases.<sup>8,9</sup>

We have designed this study as retrospective and in a single centre; it will be of major interest to observe how it performs in a variety of settings. The number of cases used to assess performance of the models is relatively small. The strengths include the comparison of machine learning tools with expert clinical opinion and the fact that very detailed and well-validated data was available both directly related to the cancer and that contained in the EAR. The generic nature of this approach makes it unnecessary to generate separate



1  
2  
3 predictive models for different types of cancer. This was a particular advantage for rarer  
4  
5 forms of cancer where predications using more conventional methods are very challenging.  
6  
7

8  
9 Predictive tools derived from clinical data items have considerable potential to improve  
10  
11 clinical care, but must be suitably optimised and shown to perform equally well in diverse  
12  
13 clinical settings.<sup>21,22</sup> Clinical databases have become more widely available and increasingly  
14  
15 complex in recent years. The extent and complexity of data available to clinicians means  
16  
17 that novel approaches to managing data and supporting clinical decisions are needed.  
18  
19 Machine learning approaches can not only cope with complex datasets, but also adapt in  
20  
21 real time and across different clinical settings.  
22  
23

24  
25  
26 The approach used in this study offers superior performance to previous machine learning  
27  
28 approaches to predicting cancer survival.<sup>1-5</sup> Previous models have been derived for single  
29  
30 cancer types, or for a limited range of cancers. The model described here performed well  
31  
32 across a wide range of cancers. One advantage of this generic approach may be the ability  
33  
34 to predict outcomes in less common cancers where limited data might preclude  
35  
36 development of specific models. The fact that our model derived from administrative and  
37  
38 cancer-related data performed slightly better than a panel of expert clinicians not only  
39  
40 validates the potential utility of the model but suggests that it may be useful in assessing  
41  
42 quality of care and also in settings where specialist care is not available.  
43  
44  
45  
46  
47

48  
49 Clinical outcomes in any illness are determined not only by specific factors related to the  
50  
51 illness itself but also by the patient's general state of health and by the presence of other  
52  
53

1  
2  
3 chronic medical conditions often coded in an EAR if the individual traffics the health  
4  
5 service.<sup>10-13</sup> As well, a particularly novel and important aspect of the use historical data from  
6  
7 the EAR in machine learning is that it effectively captures the health care institutions current  
8  
9 and previous performance. These data can be applied to any individual entering the system  
10  
11 with a newly diagnosed cancer, as we have modelled here. As well they could also be used  
12  
13 for quality and performance monitoring.  
14  
15

16  
17  
18 In conclusion, machine learning applied to information from a disease specific (cancer)  
19  
20 database and the EAR can be used to predict outcomes. Improved prediction of outcome  
21  
22 has the potential to help clinicians make more meaningful decisions about treatment and to  
23  
24 assist with planning of future social and care needs. Most importantly, the approach  
25  
26 described makes use of digital data that is already routinely collected but under-exploited  
27  
28 by clinical health systems.  
29  
30  
31  
32  
33  
34  
35  
36  
37  
38  
39  
40  
41  
42  
43  
44  
45  
46  
47  
48  
49  
50  
51  
52  
53  
54  
55  
56  
57  
58  
59  
60

## References

1. Burke HB, Goodman PH, Rosen DB, Henson DE, Weinstein JN, Harrell FE, Jr., Marks JR, Winchester DP, Bostwick DG. Artificial neural networks improve the accuracy of cancer survival prediction. *Cancer*. 1997;79:857-862
2. Lundin M, Lundin J, Burke HB, Toikkanen S, Pylkkanen L, Joensuu H. Artificial neural networks applied to survival prediction in breast cancer. *Oncology*. 1999;57:281-286
3. Manilich EA, Kiran RP, Radivoyevitch T, Lavery I, Fazio VW, Remzi FH. A novel data-driven prognostic model for staging of colorectal cancer. *Journal of the American College of Surgeons*. 2011;213:579-588, 588.e571-572
4. Gao P, Zhou X, Wang ZN, Song YX, Tong LL, Xu YY, Yue ZY, Xu HM. Which is a more accurate predictor in colorectal survival analysis? Nine data mining algorithms vs. The tnm staging system. *PLoS ONE [Electronic Resource]*. 2012;7:e42015
5. Kim W, Kim KS, Lee JE, Noh DY, Kim SW, Jung YS, Park MY, Park RW. Development of novel breast cancer recurrence prediction model using support vector machine. *Journal of Breast Cancer*. 2012;15:230-238
6. Johnson CJ, Weir HK, Fink AK, German RR, Finch JL, Rycroft RK, Yin D, Accuracy of Cancer Mortality Study G. The impact of national death index linkages on population-based cancer survival rates in the united states. *Cancer Epidemiology*. 2013;37:20-28
7. Khoury MJ, Lam TK, Ioannidis JP, Hartge P, Spitz MR, Buring JE, Chanock SJ, Croyle RT, Goddard KA, Ginsburg GS, Herceg Z, Hiatt RA, Hoover RN, Hunter DJ, Kramer BS, Lauer MS, Meyerhardt JA, Olopade OI, Palmer JR, Sellers TA, Seminara D, Ransohoff DF, Rebbeck TR, Tourassi G, Winn DM, Zauber A, Schully SD. Transforming epidemiology for 21st century medicine and public health. *Cancer Epidemiology, Biomarkers & Prevention*. 2013;22:508-516
8. Appari A, Eric Johnson M, Anthony DL. Meaningful use of electronic health record systems and process quality of care: Evidence from a panel data analysis of u.S. Acute-care hospitals. *Health Services Research*. 2013;48:354-375
9. Fitzhenry F, Murff HJ, Matheny ME, Gentry N, Fielstein EM, Brown SH, Reeves RM, Aronsky D, Elkin PL, Messina VP, Speroff T. Exploring the frontier of electronic health record surveillance: The case of postoperative complications. *Medical Care*. 2013;51:509-516
10. Lund L, Borre M, Jacobsen J, Sorensen HT, Norgaard M. Impact of comorbidity on survival of danish prostate cancer patients, 1995-2006: A population-based cohort study. *Urology*. 2008;72:1258-1262
11. Tetsche MS, Norgaard M, Jacobsen J, Wogelius P, Sorensen HT. Comorbidity and ovarian cancer survival in denmark, 1995-2005: A population-based cohort study. *International Journal of Gynecological Cancer*. 2008;18:421-427
12. Liefers JR, Baracos VE, Winget M, Fassbender K. A comparison of charlson and elixhauser comorbidity measures to predict colorectal cancer survival using administrative health data. *Cancer*. 2011;117:1957-1965
13. Braithwaite D, Moore DH, Satariano WA, Kwan ML, Hiatt RA, Kroenke C, Caan BJ. Prognostic impact of comorbidity among long-term breast cancer survivors: Results from the lace study. *Cancer Epidemiology, Biomarkers & Prevention*. 2012;21:1115-1125
14. Jones LE, Doebbeling CC. Beyond the traditional prognostic indicators: The impact of primary care utilization on cancer survival. *Journal of Clinical Oncology*. 2007;25:5793-5799

- 1
  - 2
  - 3
  - 4
  - 5
  - 6
  - 7
  - 8
  - 9
  - 10
  - 11
  - 12
  - 13
  - 14
  - 15
  - 16
  - 17
  - 18
  - 19
  - 20
  - 21
  - 22
  - 23
  - 24
  - 25
  - 26
  - 27
  - 28
  - 29
  - 30
  - 31
  - 32
  - 33
  - 34
  - 35
  - 36
  - 37
  - 38
  - 39
  - 40
  - 41
  - 42
  - 43
  - 44
  - 45
  - 46
  - 47
  - 48
  - 49
  - 50
  - 51
  - 52
  - 53
  - 54
  - 55
  - 56
  - 57
  - 58
  - 59
  - 60
15. Chang CM, Su YC, Lai NS, Huang KY, Chien SH, Chang YH, Lian WC, Hsu TW, Lee CC. The combined effect of individual and neighborhood socioeconomic status on cancer survival rates. *PLoS ONE [Electronic Resource]*. 2012;7:e44325
16. Sant M, Minicozzi P, Allemani C, Cirilli C, Federico M, Capocaccia R, Budroni M, Candela P, Crocetti E, Falcini F, Ferretti S, Fusco M, Giacomini A, La Rosa F, Mangone L, Natali M, Leon MP, Traina A, Tumino R, Zamboni P. Regional inequalities in cancer care persist in Italy and can influence survival. *Cancer Epidemiology*. 2012;36:541-547
17. Cortes C, Vapnik V. Support vector machine. *Machine learning*. 1995;20:273-297
18. Politis D, Romano J, Wolf M. *Subsampling*. Springer-Verlag, New York; 1999.
19. Friedman J, Hastie T, Tibshirani R. Regularization paths for generalized linear models via coordinate descent. *Journal of statistical software*. 2010;33:1
20. Hastie T, Tibshirani R, Friedman J, Franklin J. The elements of statistical learning: Data mining, inference and prediction. *The Mathematical Intelligencer*. 2005;27:83-85
21. Chen HC, Kodell RL, Cheng KF, Chen JJ. Assessment of performance of survival prediction models for cancer prognosis. *BMC Medical Research Methodology*. 2012;12:102
22. Chen HC, Chen JJ. Assessment of reproducibility of cancer survival risk predictions across medical centers. *BMC Medical Research Methodology*. 2013;13:25
23. Zhao X, Rodland EA, Sorlie T, Naume B, Langerød A, Frigessi A, Kristensen VN, Borresen-Dale AL, Lingjaerde OC. Combining gene signatures improves prediction of breast cancer survival. *PLoS ONE [Electronic Resource]*. 2011;6:e17845
24. Li C, Zhang S, Zhang H, Pang L, Lam K, Hui C, Zhang S. Using the k-nearest neighbor algorithm for the classification of lymph node metastasis in gastric cancer. *Computational & Mathematical Methods in Medicine*. 2012;2012:876545
25. Huang ML, Hung YH, Lee WM, Li RK, Wang TH. Usage of case-based reasoning, neural network and adaptive neuro-fuzzy inference system classification techniques in breast cancer dataset classification diagnosis. *Journal of Medical Systems*. 2012;36:407-414
26. Xu H, Fu Z, Shah A, Chen Y, Peterson NB, Chen Q, Mani S, Levy MA, Dai Q, Denny JC. Extracting and integrating data from entire electronic health records for detecting colorectal cancer cases. *AMIA ... Annual Symposium Proceedings/AMIA Symposium*. 2011;2011:1564-1572

**Table 1: ECO variables used for survival prediction**

---

**patient demographics**

post code  
Gender  
Age

**tumour characteristics**

primary site (in ICD-10 code)  
tumour stream  
morphology (in ICD-O-3 code)  
histologic grade  
metastatic sites  
most valid basis of diagnosis  
performance status diagnosis  
stage basis (pathological or clinical)  
stage (TNM)  
tumour size  
nodes taken  
positive nodes

**breast cancer related variables**

oestrogen receptor  
progesterone receptor  
human epidermal growth factor receptor 2 (HER2)

---

**Table 2: Characteristics of Derivation and Validation Cohorts**

|                      | Cohort 1: ECO         |                      | Cohort 2: ECO and EAR<br>(n=664) |
|----------------------|-----------------------|----------------------|----------------------------------|
|                      | Derivation<br>(n=869) | Validation<br>(n=94) |                                  |
| <b>Age (SD)</b>      | 67.6 (14.6)           | 68.4 (13.6)          | 66.3(14.9)                       |
| <b>Gender: Males</b> | 487 *                 | 48                   | 381                              |
| <b>Tumour stream</b> |                       |                      |                                  |
| Genitourinary        | 172                   | 21                   | 135                              |
| Colorectal           | 140                   | 14                   | 115                              |
| Lung                 | 121                   | 18                   | 96                               |
| Breast               | 122                   | 15                   | 74                               |
| Haematological       | 99                    | 7                    | 85                               |
| Upper gastro         | 83                    | 9                    | 57                               |
| Skin                 | 36                    | 1                    | 28                               |
| Head and Neck        | 35                    | 0                    | 30                               |
| Gynaecological       | 19                    | 4                    | 17                               |
| CNS                  | 15                    | 1                    | 9                                |

---

|                 |    |   |    |
|-----------------|----|---|----|
| Unknown primary | 38 | 9 | 26 |
|-----------------|----|---|----|

---

\*2 unspecified

For peer review only

1  
2  
3  
4  
5  
6  
7  
8  
9  
10  
11  
12  
13  
14  
15  
16  
17  
18  
19  
20  
21  
22  
23  
24  
25  
26  
27  
28  
29  
30  
31  
32  
33  
34  
35  
36  
37  
38  
39  
40  
41  
42  
43  
44  
45  
46  
47  
48  
49  
50  
51  
52  
53  
54  
55  
56  
57  
58  
59  
60

**Table 3: Performance of survival prediction: comparison between machine learning method and clinicians**

| Survival Period | AUC (95% CI)      |                        |
|-----------------|-------------------|------------------------|
|                 | Clinician panel   | Machine learning model |
| <b>6 months</b> | 0.79 (0.76, 0.81) | 0.87 (0.85, 0.89)      |
| <b>1 year</b>   | 0.79 (0.76, 0.81) | 0.80 (0.77, 0.82)      |
| <b>2 years</b>  | 0.75 (0.73, 0.78) | 0.76 (0.74, 0.79)      |

For peer review only



Table 4: Prediction performance of machine learning algorithms: 6-month survival

| Cancer type     | Area Under ROC Curve (95% CI) |                             |                               |
|-----------------|-------------------------------|-----------------------------|-------------------------------|
|                 | EAR only                      | ECO only                    | EAR + ECO                     |
| Genitourinary   | ·81 (.77, .85)                | ·82 (.78, .86)              | ·88 (.85, .91) <sup>*,†</sup> |
| Colorectal      | ·84 (.80, .88)                | ·85 (.81, .89)              | ·88 (.84, .91) <sup>*,†</sup> |
| Lung            | ·71 (.67, .76)                | ·73 (.69, .77) <sup>*</sup> | ·77 (.73, .82) <sup>*,†</sup> |
| Breast          | no deaths in the period       |                             |                               |
| Haematological  | ·73 (.68, .79)                | ·74 (.69, .79)              | ·76 (.71, .81)                |
| Upper gastro    | ·74 (.69, .78)                | ·64 (.60, .69)              | ·84 (.80, .87) <sup>†</sup>   |
| Skin            | ·84 (.77, .90)                | ·85 (.79, .91)              | ·91 (.86, .96) <sup>*,†</sup> |
| Head and neck   | ·66 (.61, .71)                | ·70 (.64, .75)              | ·77 (.72, .82) <sup>*,†</sup> |
| Gynaecological  | ·97 (.94, .99)                | ·99 (.98, 1.0) <sup>*</sup> | 1.0 (.99, 1.0) <sup>*</sup>   |
| CNS             | ·89 (.85, .94)                | ·84 (.78, 0.90)             | ·82 (.77, .88)                |
| Unknown primary | ·92 (.89, .95)                | ·79 (.75, .84)              | ·90 (.87, .93) <sup>*,†</sup> |

<sup>\*</sup>Significantly greater than *EAR only*. <sup>†</sup>Significantly greater than *ECO only*.

Table 5: Prediction performance of machine learning algorithms: 12-month survival

| Cancer type     | Area Under ROC Curve (95% CI) |                             |                               |
|-----------------|-------------------------------|-----------------------------|-------------------------------|
|                 | EAR only                      | ECO only                    | EAR + ECO                     |
| Genitourinary   | ·79 (·75, ·83)                | ·79 (·75, ·83)              | ·84 (·80, ·87) <sup>*,†</sup> |
| Colorectal      | ·82 (·78, ·86)                | ·83 (·79, ·86)              | ·87 (·83, ·90) <sup>*,†</sup> |
| Lung            | ·73 (·69, ·77)                | ·78 (·73, ·82) <sup>*</sup> | ·82 (·78, ·86) <sup>*,†</sup> |
| Breast          | ·71 (·65, ·78)                | ·90 (·86, ·94)              | ·92 (·89, ·96) <sup>*</sup>   |
| Haematological  | ·63 (·59, ·68)                | ·70 (·66, ·75) <sup>*</sup> | ·69 (·64, ·74) <sup>*</sup>   |
| Upper gastro    | ·62 (·57, ·66)                | ·70 (·65, ·74) <sup>*</sup> | ·72 (·68, ·76) <sup>*</sup>   |
| Skin            | ·76 (·71, ·88)                | ·89 (·85, ·93) <sup>*</sup> | ·93 (·90, ·96) <sup>*</sup>   |
| Head and neck   | ·77 (·73, ·88)                | ·68 (·63, 73)               | ·79 (·75, ·84) <sup>†</sup>   |
| Gynaecological  | ·95 (·92, ·97)                | 1·0 (1·0, 1·0) <sup>*</sup> | ·99 (·98, 1·0) <sup>*</sup>   |
| CNS             | ·66 (·58, ·73)                | ·68 (·61, ·76)              | ·69 (·63, ·76)                |
| Unknown primary | ·87 (·84, ·91)                | ·81 (·77, ·85)              | ·88 (·84, ·91)                |

\*Significantly greater than *EAR only*. †Significantly greater than *ECO only*.

Table 6: Prediction performance of machine learning algorithms: 24-month survival

| Cancer type     | Area Under ROC Curve (AUC) |                  |                    |
|-----------------|----------------------------|------------------|--------------------|
|                 | EAR only                   | ECO only         | EAR + ECO          |
| Genitourinary   | .73 (.69, .78)             | .84 (.81, .88) * | .86 (.82, .89) *,† |
| Colorectal      | .76 (.72, .80)             | .76 (.72, .80)   | .76 (.72, .80)     |
| Lung            | .74 (.69, .78)             | .78 (.73, .82) * | .82 (.79, .86) *,† |
| Breast          | .67 (.61, .73)             | .86 (.82, .90) * | .88 (.84, .92) *   |
| Haematological  | .73 (.68, .77)             | .70 (.66, .75)   | .80 (.76, .84) *,† |
| Upper gastro    | .81 (.77, .85)             | .77 (.72, .81)   | .87 (.83, .90) *,† |
| Skin            | .71 (.65, .76)             | .85 (.80, .89) * | .94 (.92, .97) *,† |
| Head and neck   | .74 (.70, .78)             | .66 (.51, .61)   | .71 (.67, .76) †   |
| Gynaecological  | .96 (.94, .99)             | .99 (.98, 1.0) * | .97 (.95, .99)     |
| CNS             | .83 (.78, .89)             | .87 (.82, .93)   | .96 (.93, .99) *,† |
| Unknown primary | .74 (.70, .79)             | .78 (.74, .82) * | .80 (.76, .84) *   |

\*Significantly greater than *EAR only*. †Significantly greater than *ECO only*.

# Appendix

---

In this section we describe the procedure used to build our machine learning model.

## Derivation of the machine learning model

We used an ensemble of classifiers to achieve a low variance model. From the derivation cohort, data is randomly split to extract 80% for training (derivation train set) and 20% for testing (derivation test set). This is done by subsampling without replacement. This procedure is repeated 400 times to generate 400 random subsamples (or training/test pairs). The training sets were used to estimate an ensemble of classifiers while the test sets were used to assess the performance of these classifiers (mean Area under ROC curve and 95% CI).

For each training set subsample, a classification model was estimated using the derivation train set. Estimation of the classifier contains two phases: feature selection and classifier design. In *feature selection*, we used an established statistical technique - a generalized linear model with  $l_1$ -norm and  $l_2$ -norm penalty (alpha parameter set to 0.1 and lambda parameter selected using 5-fold internal cross-validation) [1]. Features with nonzero coefficients were selected. Next, using this feature set, the parameters of a *linear Support Vector machine* [2] classifier were estimated. For SVM implementation, we used the open source package LIBSVM [3].

The above procedure generates an ensemble of 400 classifiers to be tested against on the held-out validation cohort. Three such classifier-ensembles were built, one for each survival prediction tasks (i.e. prediction at 6, 12 and 24 months periods).

## Predictors for the machine learning models

Table 1 EMR-based predictors

### demographics

gender  
age  
spoken language  
country of origin  
religion  
occupation  
marital status  
insurance type

### cancer specific diagnoses

primary site  
tumor stream (e.g., breast)  
tumor  
morphology code  
topology code

### patient history (in the previous 1 month, 3 months, and 6 months)

number of inpatient admissions  
number of ED visits  
number of admissions from ED  
longest length of hospital stay  
average length of hospital stay  
number of operations  
number of oncology visits  
number of histology tests  
discharge diagnoses in ICD-10  
diagnosis-related groups codes  
procedure codes

Table 2 ECO-based predictors.

**patient demographics**

Gender

Age

**tumour characteristics**

primary site (in ICD-10 code)

tumour stream

morphology (in ICD-O-3 code)

histologic grade

metastatic sites

most valid basis of diagnosis

performance status diagnosis

stage basis (pathological or clinical)

stage (TNM)

tumour size

nodes taken

positive nodes

**breast cancer related variables**

oestrogen receptor

progesterone receptor

human epidermal growth factor receptor 2 (HER2)

**References**

1. Tibshirani R. Regression shrinkage and selection via the lasso. Journal of the Royal Statistical Society. Series B (Methodological) 1996;**58**(1):267-88
2. Cortes C, Vapnik V. Support vector machine. Machine learning 1995;**20**(3):273-97
3. Chang C-C, Lin C-J. LIBSVM: a library for support vector machines. ACM Transactions on Intelligent Systems and Technology (TIST) 2011;**2**(3):27

**STARD checklist for reporting of studies of diagnostic accuracy**  
(version January 2003)

| Section and Topic           | Item # |                                                                                                                                                                                                                                                     | On page #     |
|-----------------------------|--------|-----------------------------------------------------------------------------------------------------------------------------------------------------------------------------------------------------------------------------------------------------|---------------|
| TITLE/ABSTRACT/<br>KEYWORDS | 1      | Identify the article as a study of diagnostic accuracy (recommend MeSH heading 'sensitivity and specificity').                                                                                                                                      | 1-4           |
| INTRODUCTION                | 2      | State the research questions or study aims, such as estimating diagnostic accuracy or comparing accuracy between tests or across participant groups.                                                                                                | 5-8           |
| <b>METHODS</b>              |        |                                                                                                                                                                                                                                                     |               |
| <i>Participants</i>         | 3      | The study population: The inclusion and exclusion criteria, setting and locations where data were collected.                                                                                                                                        | 9             |
|                             | 4      | Participant recruitment: Was recruitment based on presenting symptoms, results from previous tests, or the fact that the participants had received the index tests or the reference standard?                                                       | 9             |
|                             | 5      | Participant sampling: Was the study population a consecutive series of participants defined by the selection criteria in item 3 and 4? If not, specify how participants were further selected.                                                      | Yes           |
|                             | 6      | Data collection: Was data collection planned before the index test and reference standard were performed (prospective study) or after (retrospective study)?                                                                                        | retrospective |
| <i>Test methods</i>         | 7      | The reference standard and its rationale.                                                                                                                                                                                                           | 9-10          |
|                             | 8      | Technical specifications of material and methods involved including how and when measurements were taken, and/or cite references for index tests and reference standard.                                                                            | 9-10          |
|                             | 9      | Definition of and rationale for the units, cut-offs and/or categories of the results of the index tests and the reference standard.                                                                                                                 | 9-10          |
|                             | 10     | The number, training and expertise of the persons executing and reading the index tests and the reference standard.                                                                                                                                 | N/A           |
|                             | 11     | Whether or not the readers of the index tests and reference standard were blind (masked) to the results of the other test and describe any other clinical information available to the readers.                                                     | N/A           |
| <i>Statistical methods</i>  | 12     | Methods for calculating or comparing measures of diagnostic accuracy, and the statistical methods used to quantify uncertainty (e.g. 95% confidence intervals).                                                                                     | 10-12         |
|                             | 13     | Methods for calculating test reproducibility, if done.                                                                                                                                                                                              | 10-12         |
| <b>RESULTS</b>              |        |                                                                                                                                                                                                                                                     |               |
| <i>Participants</i>         | 14     | When study was performed, including beginning and end dates of recruitment.                                                                                                                                                                         | 9             |
|                             | 15     | Clinical and demographic characteristics of the study population (at least information on age, gender, spectrum of presenting symptoms).                                                                                                            | 21            |
|                             | 16     | The number of participants satisfying the criteria for inclusion who did or did not undergo the index tests and/or the reference standard; describe why participants failed to undergo either test (a flow diagram is strongly recommended).        | N/A           |
| <i>Test results</i>         | 17     | Time-interval between the index tests and the reference standard, and any treatment administered in between.                                                                                                                                        | N/A           |
|                             | 18     | Distribution of severity of disease (define criteria) in those with the target condition; other diagnoses in participants without the target condition.                                                                                             | N/A           |
|                             | 19     | A cross tabulation of the results of the index tests (including indeterminate and missing results) by the results of the reference standard; for continuous results, the distribution of the test results by the results of the reference standard. | N/A           |
|                             | 20     | Any adverse events from performing the index tests or the reference standard.                                                                                                                                                                       | N/A           |
| <i>Estimates</i>            | 21     | Estimates of diagnostic accuracy and measures of statistical uncertainty (e.g. 95% confidence intervals).                                                                                                                                           | 23-25         |
|                             | 22     | How indeterminate results, missing data and outliers of the index tests were handled.                                                                                                                                                               | N/A           |
|                             | 23     | Estimates of variability of diagnostic accuracy between subgroups of participants, readers or centers, if done.                                                                                                                                     | N/A           |
|                             | 24     | Estimates of test reproducibility, if done.                                                                                                                                                                                                         | N/A           |
| DISCUSSION                  | 25     | Discuss the clinical applicability of the study findings.                                                                                                                                                                                           | 15-17         |



**Machine-learning prediction of cancer survival: a retrospective study using electronic administrative records and a cancer registry**

|                                 |                                                                                                                                                                                                                                                                                                                                                                                                                                                                                                                                                                                                                                                                                                                                                                                                                                                                                                                                                                                |
|---------------------------------|--------------------------------------------------------------------------------------------------------------------------------------------------------------------------------------------------------------------------------------------------------------------------------------------------------------------------------------------------------------------------------------------------------------------------------------------------------------------------------------------------------------------------------------------------------------------------------------------------------------------------------------------------------------------------------------------------------------------------------------------------------------------------------------------------------------------------------------------------------------------------------------------------------------------------------------------------------------------------------|
| Journal:                        | <i>BMJ Open</i>                                                                                                                                                                                                                                                                                                                                                                                                                                                                                                                                                                                                                                                                                                                                                                                                                                                                                                                                                                |
| Manuscript ID:                  | bmjopen-2013-004007.R1                                                                                                                                                                                                                                                                                                                                                                                                                                                                                                                                                                                                                                                                                                                                                                                                                                                                                                                                                         |
| Article Type:                   | Research                                                                                                                                                                                                                                                                                                                                                                                                                                                                                                                                                                                                                                                                                                                                                                                                                                                                                                                                                                       |
| Date Submitted by the Author:   | 17-Feb-2014                                                                                                                                                                                                                                                                                                                                                                                                                                                                                                                                                                                                                                                                                                                                                                                                                                                                                                                                                                    |
| Complete List of Authors:       | Gupta, Sunil; Deakin University, Centre for Pattern Recognition and Data Analytics<br>Tran, Truyen; Deakin University, Centre for Pattern Recognition and Data Analytics<br>Luo, Wei; Deakin University, Centre for Pattern Recognition and Data Analytics<br>Phung, Dinh; Deakin University, Centre for Pattern Recognition and Data Analytics<br>Kennedy, Richard; Deakin University, School of Medicine<br>Broad, Adam; Barwon Health, Andrew Love Cancer Centre<br>Campbell, David; Barwon Health, Andrew Love Cancer Centre<br>Kipp, David; Barwon Health, Andrew Love Cancer Centre<br>Singh, Madhu; Barwon Health, Andrew Love Cancer Centre<br>Khasraw, Mustafa; Barwon Health, Andrew Love Cancer Centre<br>Matheson, Leigh; Barwon Southwest Integrated Cancer Service,<br>Ashley, David; Barwon Health, Andrew Love Cancer Centre; Deakin University, School of Medicine<br>Venkatesh, Svetha; Deakin University, Centre for Pattern Recognition and Data Analytics |
| <b>Primary Subject Heading</b>: | Oncology                                                                                                                                                                                                                                                                                                                                                                                                                                                                                                                                                                                                                                                                                                                                                                                                                                                                                                                                                                       |
| Secondary Subject Heading:      | Health informatics                                                                                                                                                                                                                                                                                                                                                                                                                                                                                                                                                                                                                                                                                                                                                                                                                                                                                                                                                             |
| Keywords:                       | Cancer, Survival, Prediction, Machine Learning, Electronic Medical Record                                                                                                                                                                                                                                                                                                                                                                                                                                                                                                                                                                                                                                                                                                                                                                                                                                                                                                      |
|                                 |                                                                                                                                                                                                                                                                                                                                                                                                                                                                                                                                                                                                                                                                                                                                                                                                                                                                                                                                                                                |

SCHOLARONE™  
Manuscripts



1  
2  
3 Machine-learning prediction of cancer survival: a retrospective study  
4  
5  
6 using electronic administrative records and a cancer registry  
7  
8  
9

10  
11 Sunil Gupta<sup>1</sup>, Truyen Tran<sup>1,2</sup>, Wei Luo<sup>1</sup>, Dinh Phung<sup>1</sup>, Richard Lee Kennedy<sup>3</sup>, Adam Broad<sup>4</sup>,  
12  
13 David Campbell<sup>4</sup>, David Kipp<sup>4</sup>, Madhu Singh<sup>4</sup>, Mustafa Khasraw<sup>3,4</sup>, Leigh Matheson<sup>5</sup>, David  
14  
15 M Ashley<sup>3,4,5</sup>, Svetha Venkatesh<sup>1\*</sup>  
16  
17

18  
19  
20  
21 <sup>1</sup>Centre for Pattern Recognition and Data Analytics, Deakin University, Geelong, Victoria,  
22  
23 Australia

24  
25  
26 <sup>2</sup>Department of Computing, Curtin University, Perth, Western Australia, Australia  
27

28  
29 <sup>3</sup>School of Medicine, Deakin University, Geelong, Victoria, Australia  
30

31  
32 <sup>4</sup>Andrew Love Cancer Centre, Barwon Health, Geelong, Victoria, Australia  
33

34  
35 <sup>5</sup>Barwon Southwest Integrated Cancer Service, Geelong, Victoria, Australia  
36

37  
38 \*Correspondence to: Svetha Venkatesh, Centre for Pattern Recognition and Data Analytics,  
39  
40 Deakin University, Geelong, Victoria, Australia 3220 [svetha.venkatesh@deakin.edu.au](mailto:svetha.venkatesh@deakin.edu.au)

41  
42 Telephone: +61 3 5227 2905 Fax: +61 3 5227 2028  
43

44  
45 Total Number of Text Pages: 24

46  
47 Total Number of Tables: 6

48  
49 Total Number of Illustrations: 0

50  
51 Abstract word count: 293  
52

1  
2  
3 Word count: 4,680  
4  
5  
6  
7

8  
9 *Keywords: Cancer; Survival; Prediction; Machine learning; Electronic medical record*  
10  
11  
12  
13  
14  
15  
16  
17  
18  
19  
20  
21  
22  
23  
24  
25  
26  
27  
28  
29  
30  
31  
32  
33  
34  
35  
36  
37  
38  
39  
40  
41  
42  
43  
44  
45  
46  
47  
48  
49  
50  
51  
52  
53  
54  
55  
56  
57  
58  
59  
60

For peer review only

**Abstract**

*Objectives:* Using the prediction of cancer outcome as a model, we have tested the hypothesis that through analysing routinely collected digital data contained in an electronic administrative record (EAR), using machine learning techniques, we could enhance conventional methods in predicting clinical outcomes.

*Setting:* A regional cancer centre in Australia.

*Participants:* Disease specific data from a purpose built cancer registry (ECO) from 869 patients was used to predict survival at 6, 12, and 24 months. The model was validated with data from a further 94 patients, and results compared to assessment of five specialist oncologists. Machine-learning prediction using ECO data was compared with that using EAR and a model combining ECO and EAR data.

*Primary and secondary outcome measures:* Survival prediction accuracy in terms of the area of the ROC curve.

*Results:* The ECO model yielded AUCs of 0·87 (95% CI=0·848–0·890) at six months, 0·796 (95% CI=0·774–0·823) at 12 months, and 0·764 (95% CI=0·737–0·789) at 24 months. Each was slightly better than the performance of the clinician panel. The model performed consistently across a range of cancers, including rare cancers. Combining ECO and EAR data yielded better prediction than the ECO-based model (AUCs ranging from 0·757 to 0·997 for 6 months, AUCs from 0·689 to 0·988 for 12 months, and AUCS from 0·713 to 0·973 for 24

1  
2  
3 months). The best prediction was for genitourinary, head and neck, lung, skin and upper  
4  
5 gastrointestinal tumours.  
6  
7

8  
9 *Conclusion:* Machine learning applied to information from a disease specific (cancer)  
10  
11 database and the EAR can be used to predict clinical outcomes. Importantly, the approach  
12  
13 described made use of a digital data that is already routinely collected but under-exploited  
14  
15 by clinical health systems.  
16  
17  
18  
19  
20  
21  
22  
23  
24  
25  
26  
27  
28  
29  
30  
31  
32  
33  
34  
35  
36  
37  
38  
39  
40  
41  
42  
43  
44  
45  
46  
47  
48  
49  
50  
51  
52  
53  
54  
55  
56  
57  
58  
59  
60

1  
2  
3 ***Strengths and limitations of this study***  
4

- 5
- 6 • This is the first study using machine learning of both administrative and registry data for  
7 cancer survival prediction.  
8
  - 9 • A single prognosis model is produced across all cancers, improving prediction accuracy  
10 on rare cancers.  
11
  - 12 • This is a retrospective study in a single centre.  
13  
14  
15  
16  
17  
18  
19  
20  
21  
22  
23  
24  
25  
26  
27  
28  
29  
30  
31  
32  
33  
34  
35  
36  
37  
38  
39  
40  
41  
42  
43  
44  
45  
46  
47  
48  
49  
50  
51  
52  
53  
54  
55  
56  
57  
58  
59  
60

## Introduction

Over the past two decades there has been an explosion in the use of digital footprints to monitor and predict human behaviours. The source of data used for this purpose is our on-line use of the internet, the emails we send and transactions we make. Analysis of these footprints through machine learning techniques (MLT) have been exploited in the public domain by government and business to predict behaviours and inform investment decisions. In research MLT have also been used to analyse gene expression data,<sup>1,2</sup> and for medical image analysis.<sup>3,4</sup> However to date, there has been little exploration of these methodologies in the clinical setting. We hypothesised that MLT may offer a paradigm shift in clinical medicine that can address core issues with large and complex datasets. These techniques offer the potential to derive adaptive systems from diverse datasets, discover latent connections between data items, and to predict outcomes.

Most hospitals routinely collect large digital electronic administrative records (EAR). These are primarily used for organisational financial management. Historically, they have not been used extensively for clinical or research purposes. If these large data sets are able to be exploited using MLT it may open the way to optimise the use of collected administrative data to assist in predicting patients outcome, planning individualised patient care, monitoring resource utilisation, and improving institutional performance.<sup>5,6</sup> The accurate assessment of comorbid status would improve assessment of prognosis and guide treatment decisions.<sup>7-10</sup> Other important information that may be contained or inferred

1  
2  
3 from an EAR includes geographical and demographic data, socioeconomic status, and  
4  
5 history of health care facility utilisation.<sup>2, 11, 12</sup>  
6  
7

8  
9 In this study, using cancer outcome prediction as a model, we wished to test the hypothesis  
10  
11 that routinely collected digital health data, if analysed by state of the art, validated, machine  
12  
13 learning techniques could be used to assist conventional tools in predicting clinical  
14  
15 outcomes.  
16

17  
18  
19 Accurate prediction of survival in patients with cancer remains a challenge due to the ever-  
20  
21 increasing heterogeneity and complexity of cancer, treatment options, and patient  
22  
23 populations. If achieved, reliable predictions could assist personalised care and treatment,  
24  
25 and improve institutional performance in cancer management. In current practice clinicians  
26  
27 use data collected at the bedside in consultations, medical records or purpose built cancer  
28  
29 registries to aid prognostication and decision making.  
30  
31

32  
33  
34 The notion of using MLT to predict cancer prognosis from clinical and pathological data is  
35  
36 not a new one.<sup>13, 14</sup> However, with the advent of more sophisticated and better validated  
37  
38 techniques, not only is more accurate prediction possible, but the range of data  
39  
40 incorporated into decision aids can be increased.<sup>15-17</sup> The need to improve cancer care  
41  
42 systems by creating linkages between registries and epidemiological surveillance through  
43  
44 analysis of complex and large clinical databases has recently been highlighted.<sup>18, 19</sup>  
45  
46  
47

48  
49 In this study we tested the capability of MLT to predict patient outcomes in a  
50  
51 heterogeneous cohort of cancer patients. We have interrogated two data sets: the first a  
52  
53

1  
2  
3 purpose-built cancer specific registry (ECO) containing demographic and tumour-related  
4  
5 data items according to an Australian nationally agreed protocol; the second a hospital  
6  
7 digital data set containing information about the patient's previous admissions and  
8  
9 presentations (EAR). Finally, in a test group of 94 patients, we examined the performance of  
10  
11 machine-learning methods in aiding a panel of expert clinicians in predicting patient  
12  
13 survival.  
14  
15  
16  
17  
18  
19  
20  
21  
22  
23  
24  
25  
26  
27  
28  
29  
30  
31  
32  
33  
34  
35  
36  
37  
38  
39  
40  
41  
42  
43  
44  
45  
46  
47  
48  
49  
50  
51  
52  
53  
54  
55  
56  
57  
58  
59  
60

For peer review only



## ***Patients and Methods***

### *Study design*

This is a retrospective study using the electronic administrative record (EAR) and a specialised cancer registry (ECO) from Barwon Health, the only public tertiary institution in a region of Australia with more than 350,000 residents. With a unified hospital identity number in use across the region, Barwon Health's EAR provides a single point of access for information on patient encounters with the health system, including hospitalizations, ED visits, medications, and treatments. In addition, the Andrew Love Cancer Centre at Barwon health has a specialised cancer registry called ECO, which captures clinical data for patients in the region. ECO records information on demographics, primary tumour and metastatic tumour, cancer stage, tumour size, lymph nodes, and breast tumour specific information. Treatment type, outcomes, including death, and recurrence information (primary and metastatic) are also recorded. Table 1 shows the variables used for survival prediction. The cohort for this study consists of 963 patients identified in ECO who were first diagnosed in year 2009. The study completion date was October 31, 2012; therefore all patients had at least 2 year and 10 months follow-up. Among these patients, 736 patients also had records in the EAR. Ethics approval was obtained from the Hospital and Research Ethics Committee at Barwon Health (number 12/83). Deakin University has reciprocal ethics authorization with Barwon Health.

### ***Analyses***

1  
2  
3 The analyses centred on predicting cancer survival since the date of diagnosis, defined as  
4 the date of tumour resection. Each patient was a unit of observation in the predictive  
5 problem: Patient data collected prior to the diagnosis date were used to construct the  
6 independent variables; Survival status in a period following the assessment was the  
7 dependent variable. Two analyses were performed: The first compared survival prediction  
8 made by machine learning models and the clinician panel, based on only information from  
9 ECO. The second analysis evaluated the added discriminative power provided by EAR, by  
10 comparing the best machine learning models using three sets of predicting variables:  
11 variables from ECO (Table 1), variables from EAR (appendix), and the union of the two.  
12  
13  
14  
15  
16  
17  
18  
19  
20  
21  
22  
23  
24

25 Although a survival analysis model (e.g., a proportional hazards model<sup>20</sup>) is commonly used  
26 in modelling risk factors, such models are not designed to predict events. In this study,  
27 survival was directly modelled using classification models to optimize prediction accuracy.  
28  
29  
30  
31  
32

### 33 *Comparing predictions by machine learning models and clinician*

34 In the first analysis, all 963 patients in the ECO registry were randomly divided into a  
35 derivation cohort of 869 patients and a validation cohort of 94 patients (Table 2). To collect  
36 clinician prediction, patients in the validation cohort were assigned to a panel of five  
37 oncologists for survival prediction. For each patient, the oncologist was asked to estimate  
38 the survival probabilities based on the independent variables in Table 1. All clinicians  
39 estimated the patient's survival status by producing a probability for each of the three time  
40 periods—6 months, 1 year, and 2 years. When making this assessment the clinicians did not  
41 have knowledge of the treatment type offered or given to the patient. Three machine-  
42  
43  
44  
45  
46  
47  
48  
49  
50  
51  
52  
53  
54

1  
2  
3 learning models were trained on the derivation cohort using the same set of independent  
4  
5 variables, one for each prediction period. Each of the machine learning models was an  
6  
7 ensemble of 400 support vector machines<sup>21</sup> with linear kernel (i.e., the output of the model  
8  
9 was the average of 400 support-vector-machine outputs in Platt's a posteriori  
10  
11 probabilities<sup>22</sup>). Ensemble was used to control the variability introduced by *L1* feature  
12  
13 selection. Each of the support vector machines was trained using a random 80%  
14  
15 subsampling (without replacement) of the derivation cohort.<sup>23</sup> The soft margin parameter  
16  
17 (C) of SVM was selected through cross-validation. Two measures were taken to improve the  
18  
19 training process. First, to compensate for the imbalance between the two outcomes (there  
20  
21 were more survivals than deaths), we oversampled the non-surviving cases by 50% in each  
22  
23 training subsample. Next, variable selection was performed through fitting a generalized  
24  
25 linear model with elastic net regularization<sup>24</sup> (alpha parameter set to 0.1 and lambda  
26  
27 parameter selected using 5-fold internal cross-validation) and variables with zero  
28  
29 coefficients were removed. After the machine learning models were constructed, they were  
30  
31 applied to predict survival probabilities for each patient in the validation cohort. Both the  
32  
33 clinician and model predictions were validated with the actual outcomes in the ECO registry.  
34  
35 Prediction performance was measured using the area under the ROC curve (AUC), also  
36  
37 known as the C-statistic.<sup>25</sup> 95% confidence intervals of AUCs were computed using 1000  
38  
39 bootstrap samples of validation cohort.  
40  
41  
42  
43  
44  
45  
46  
47  
48

49 *Comparing discriminative information from specialized registry and routine data*  
50  
51  
52  
53  
54  
55  
56  
57  
58  
59  
60

1  
2  
3 The second analysis compared the discriminative power of two data sources (ECO and EAR).  
4  
5 In this analysis, clinician predictions were not solicited. Among the 869 patients in the  
6  
7 derivation subset of Cohort 1, only 664 have records in the EAR and these patients were  
8  
9 included in the second analysis (Cohort 2, Table 2). Survival prediction models were derived  
10  
11 based on three sets of independent variables: 1) independent variables from EAR (EAR  
12  
13 only); 2) independent variables from ECO (ECO only); 3) the union of the two sets (*EAR +*  
14  
15 *ECO*). Similar to the previous analysis, the models were trained using 400 random  
16  
17 subsamples comprising 80% data of the cohort-2 and the modelling process was identical.  
18  
19 However, the models were evaluated not using the validation cohort. Instead, for each 80%  
20  
21 subsample, the remaining 20% was used to compute the AUC and its 95% confidence  
22  
23 interval.  
24  
25  
26  
27  
28  
29

30 The Wilcoxon rank-sum test was applied to answer the following comparison problems:  
31  
32

- 33 1. Does *ECO only* provide more discriminative power than *EAR only*?
  - 34 2. Does *EAR + ECO* provide more discriminative power than *EAR only*?
  - 35 3. Does *EAR + ECO* provide more discriminative power than *ECO only*?
- 36  
37  
38  
39  
40

41 Details of the machine learning model and the predictor variables can be found in the  
42  
43 Appendix.  
44  
45  
46  
47

## 48 **Results**

49  
50  
51  
52  
53  
54  
55  
56  
57  
58  
59  
60

1  
2  
3 The cohorts for the two analyses are summarized in Table 2. The comparison between the  
4  
5 algorithmic predictions and the clinician predictions are summarized in Table 3. The model  
6  
7 had comparable performance to that of the clinicians, with the performance of the machine  
8  
9 learning model marginally better (AUC ranging from 0.76 to 0.87) than that of the clinicians  
10  
11 (AUC ranging from 0.75 to 0.79) for all three prediction periods. This similarity in accuracy  
12  
13 between algorithmic predictions and the clinician predictions was observed across different  
14  
15 cancer types. Consider the predictions for six-month survival. Out of 15 breast cancer cases,  
16  
17 the clinicians made 15 correct predictions and the algorithm made 14; Out of 18 lung cancer  
18  
19 cases, the clinicians made 13 correct predictions and the algorithm made 14; Out of 7  
20  
21 haematological cases, both the clinicians and the algorithm made all predictions correctly.  
22  
23 Similar results were observed on 12-month and 24-month survival predictions for different  
24  
25 cancers.  
26  
27  
28  
29  
30  
31

32 Prediction of 6-month survival using the three models is shown in Table 4. There were no  
33  
34 deaths from breast cancer during this period. Comparing the ECO model with the EAR  
35  
36 model, AUCs were comparable for colorectal, genitourinary, haematological, head and neck  
37  
38 and skin tumours. The EAR model was significantly better ( $p < 0.05$ ) for rare tumours; CNS,  
39  
40 upper gastrointestinal and unassigned primary source tumours. For each tumour type, the  
41  
42 model using both ECO and EAR data yielded similar or better performance to the models  
43  
44 using information from only one of the two databases. AUCs for the combined model  
45  
46 ranged from 0.76 to 1.0. The combined data model showed particularly improved  
47  
48  
49  
50  
51  
52  
53  
54  
55  
56  
57  
58  
59  
60

1  
2  
3 performance over ECO data ( $p$  value  $< .05$ ) for all tumour streams except and breast and CNS  
4  
5 tumours.  
6  
7

8  
9 Data for 12-month survival prediction is shown in Table 5. Cancer-specific ECO data yielded  
10  
11 better prediction than EAR data ( $p < 0.05$ ) for gynaecological, haematological lung, skin and  
12  
13 unknown primary cancers. Otherwise, ECO and EAR models yielded generally similar results.  
14  
15 The model using combined data performed better than EAR ( $p$  value  $< .05$ ) for all tumour  
16  
17 streams other than CNS, head and neck and upper gastro tumours. The model using  
18  
19 combined data was better than ( $P < 0.05$ ) ECO for all cancers except breast, CNS,  
20  
21 gynaecological and haematological cancers.  
22  
23  
24  
25

26 Table 6 shows data for 24-month survival prediction by the three models. The ECO model  
27  
28 yielded superior prediction ( $p$  value  $< .05$ ) to the EAR model for breast, genitourinary,  
29  
30 gynaecological, lung, skin and unknown primary cancers, while the EAR model was superior  
31  
32 to the ECO model for haematological and head and neck tumours. Once more the model  
33  
34 that performed the best was that derived from both ECO and EAR data with AUCs ranging  
35  
36 from 0.71 to 0.97 across the range of cancers and particularly enhanced performance for all  
37  
38 cancers except breast, colorectal, gynaecological and unknown primary tumours compared  
39  
40 to the ECO. In summary, over all time periods, the performance of the combined model was  
41  
42 better than ECO ( $p < 0.05$ ) for genitourinary, head and neck, lung, skin and upper  
43  
44 gastrointestinal tumours.  
45  
46  
47  
48  
49  
50  
51  
52  
53  
54  
55  
56  
57  
58  
59  
60

1  
2  
3 One of the key advantage of using machine learning technique is that it can combine the  
4  
5 large number of non-clinical factors with the few clinical risk factors. In this study, the model  
6  
7 selected most of the known clinical risk factors including *patient age*, *cancer staging*,  
8  
9 *performance status*, and *tumour size*. In addition it also found some useful non-clinical risk  
10  
11 factors, including the type of the last hospital admission (emergency vs. elective), the  
12  
13 frequency of ED visits within the previous 3 months and 6 months (related to both cancer  
14  
15 and other medical conditions).  
16  
17  
18  
19  
20  
21

## 22 **Discussion**

23  
24 In this study, using cancer outcome prediction as a model, we wished to test the hypothesis  
25  
26 that routinely collected digital health data, if analysed by MLT, could be used to assist  
27  
28 conventional tools in predicting clinical outcomes.  
29  
30  
31

32 Applying machine learning to data from the electronic administrative record (EAR) alone  
33  
34 predicted clinical outcomes with reasonable accuracy. Using the purpose built ECO data set,  
35  
36 the predictive tool also performed well across a broad range of cancer types, and in both  
37  
38 cases the predictive accuracies were at least as good as that of a panel of five expert  
39  
40 clinicians. Importantly a predictive tool derived from both the purpose built clinical registry  
41  
42 and administrative data had even greater predictive ability.  
43  
44  
45

46  
47 The wealth of administrative data contained in the EAR includes information on comorbid  
48  
49 conditions and previous clinic and hospital attendances as well as a drug history. There is  
50  
51  
52  
53  
54  
55  
56  
57  
58  
59  
60

1  
2  
3 considerable potential to use this data to improve clinical care across a spectrum of  
4  
5 diseases.<sup>5,6</sup>  
6  
7

8  
9 Most patients in the study were followed up for 3 years, which may not be adequate to  
10  
11 capture all oncologic outcomes, especially for those cancers with low mortality rate. We  
12  
13 have designed this study as retrospective and in a single centre; it will be of major interest  
14  
15 to observe how it performs in a variety of settings. The number of cases used to assess  
16  
17 performance of the models is relatively small. The strengths include the comparison of  
18  
19 machine learning tools with expert clinical opinion and the fact that very detailed and well-  
20  
21 validated data was available both directly related to the cancer and that contained in the  
22  
23 EAR. The generic nature of this approach makes it unnecessary to generate separate  
24  
25 predictive models for different types of cancer. This was a particular advantage for rarer  
26  
27 forms of cancer where predications using more conventional methods are very challenging.  
28  
29  
30  
31

32  
33 Predictive tools derived from clinical data items have considerable potential to improve  
34  
35 clinical care, but must be suitably optimised and shown to perform equally well in diverse  
36  
37 clinical settings.<sup>26,27</sup> Clinical databases have become more widely available and increasingly  
38  
39 complex in recent years. The extent and complexity of data available to clinicians means  
40  
41 that novel approaches to managing data and supporting clinical decisions are needed.  
42  
43  
44  
45 Machine learning approaches can not only cope with complex datasets, but also adapt in  
46  
47 real time and across different clinical settings.  
48  
49  
50  
51  
52  
53  
54  
55  
56  
57  
58  
59  
60



1  
2  
3 The approach used in this study offers superior performance to previous machine learning  
4 approaches to predicting cancer survival.<sup>13-17</sup> Previous models have been derived for single  
5 cancer types, or for a limited range of cancers. The model described here performed well  
6 across a wide range of cancers. One advantage of this generic approach may be the ability  
7 to predict outcomes in less common cancers where limited data might preclude  
8 development of specific models. The fact that our model derived from administrative and  
9 cancer-related data performed slightly better than a panel of expert clinicians not only  
10 validates the potential utility of the model but suggests that it may be useful in assessing  
11 quality of care and also in settings where specialist care is not available. An alternative  
12 approach to borrow information across different cancer types is call multi-task learning. We  
13 are currently exploring this approach as well.  
14  
15  
16  
17  
18  
19  
20  
21  
22  
23  
24  
25  
26  
27  
28  
29

30 Clinical outcomes in any illness are determined not only by specific factors related to the  
31 illness itself but also by the patient's general state of health and by the presence of other  
32 chronic medical conditions often coded in an EAR if the individual traffics the health  
33 service.<sup>7-10</sup> As well, a particularly novel and important aspect of the use historical data from  
34 the EAR in machine learning is that it effectively captures the health care institutions current  
35 and previous performance. These data can be applied to any individual entering the system  
36 with a newly diagnosed cancer, as we have modelled here. As well they could also be used  
37 for quality and performance monitoring.  
38  
39  
40  
41  
42  
43  
44  
45  
46  
47  
48

49 In conclusion, machine learning applied to information from a disease specific (cancer)  
50 database and the EAR can be used to predict outcomes. Improved prediction of outcome  
51  
52  
53  
54

1  
2  
3 has the potential to help clinicians make more meaningful decisions about treatment and to  
4  
5 assist with planning of future social and care needs. Most importantly, the approach  
6  
7 described makes use of digital data that is already routinely collected but under-exploited  
8  
9  
10 by clinical health systems.  
11  
12  
13  
14  
15  
16  
17  
18  
19  
20  
21  
22  
23  
24  
25  
26  
27  
28  
29  
30  
31  
32  
33  
34  
35  
36  
37  
38  
39  
40  
41  
42  
43  
44  
45  
46  
47  
48  
49  
50  
51  
52  
53  
54  
55  
56  
57  
58  
59  
60

For peer review only

1  
2  
3  
4  
5  
6  
7  
8  
9  
10  
11  
12  
13  
14  
15  
16  
17  
18  
19  
20  
21  
22  
23  
24  
25  
26  
27  
28  
29  
30  
31  
32  
33  
34  
35  
36  
37  
38  
39  
40  
41  
42  
43  
44  
45  
46  
47  
48  
49  
50  
51  
52  
53  
54  
55  
56  
57  
58  
59  
60

Acknowledgements: The authors have no financial disclosures, conflicts of interest, or external funding sources to claim.

Contributorship Statement: All authors of this research paper have directly participated in the planning, execution, or analysis of the study. All authors of this paper have read and approved the final version submitted.

Competing Interests: None

Data Sharing Statement: No additional data

For peer review only

## References

1. Zhao X, Rodland EA, Sorlie T, et al. Combining gene signatures improves prediction of breast cancer survival. *PLoS ONE [Electronic Resource]*. 2011;6:e17845
2. Chang CM, Su YC, Lai NS, et al. The combined effect of individual and neighborhood socioeconomic status on cancer survival rates. *PLoS ONE [Electronic Resource]*. 2012;7:e44325
3. Li C, Zhang S, Zhang H, et al. Using the k-nearest neighbor algorithm for the classification of lymph node metastasis in gastric cancer. *Computational & Mathematical Methods in Medicine*. 2012;2012:876545
4. Huang ML, Hung YH, Lee WM, et al. Usage of case-based reasoning, neural network and adaptive neuro-fuzzy inference system classification techniques in breast cancer dataset classification diagnosis. *Journal of Medical Systems*. 2012;36:407-414
5. Appari A, Eric Johnson M, Anthony DL. Meaningful use of electronic health record systems and process quality of care: Evidence from a panel data analysis of u.S. Acute-care hospitals. *Health Services Research*. 2013;48:354-375
6. Fitzhenry F, Murff HJ, Matheny ME, et al. Exploring the frontier of electronic health record surveillance: The case of postoperative complications. *Medical Care*. 2013;51:509-516
7. Lund L, Borre M, Jacobsen J, et al. Impact of comorbidity on survival of danish prostate cancer patients, 1995-2006: A population-based cohort study. *Urology*. 2008;72:1258-1262
8. Tetsche MS, Norgaard M, Jacobsen J, et al. Comorbidity and ovarian cancer survival in denmark, 1995-2005: A population-based cohort study. *International Journal of Gynecological Cancer*. 2008;18:421-427
9. Lieffers JR, Baracos VE, Winget M, et al. A comparison of charlson and elixhauser comorbidity measures to predict colorectal cancer survival using administrative health data. *Cancer*. 2011;117:1957-1965
10. Braithwaite D, Moore DH, Satariano WA, et al. Prognostic impact of comorbidity among long-term breast cancer survivors: Results from the lace study. *Cancer Epidemiology, Biomarkers & Prevention*. 2012;21:1115-1125
11. Jones LE, Doebbeling CC. Beyond the traditional prognostic indicators: The impact of primary care utilization on cancer survival. *Journal of Clinical Oncology*. 2007;25:5793-5799
12. Sant M, Minicozzi P, Allemani C, et al. Regional inequalities in cancer care persist in italy and can influence survival. *Cancer Epidemiology*. 2012;36:541-547
13. Burke HB, Goodman PH, Rosen DB, et al. Artificial neural networks improve the accuracy of cancer survival prediction. *Cancer*. 1997;79:857-862
14. Lundin M, Lundin J, Burke HB, et al. Artificial neural networks applied to survival prediction in breast cancer. *Oncology*. 1999;57:281-286
15. Manilich EA, Kiran RP, Radivoyevitch T, et al. A novel data-driven prognostic model for staging of colorectal cancer. *Journal of the American College of Surgeons*. 2011;213:579-588, 588.e571-572

16. Gao P, Zhou X, Wang ZN, et al. Which is a more accurate predictor in colorectal survival analysis? Nine data mining algorithms vs. The tnm staging system. *PLoS ONE [Electronic Resource]*. 2012;7:e42015
17. Kim W, Kim KS, Lee JE, et al. Development of novel breast cancer recurrence prediction model using support vector machine. *Journal of Breast Cancer*. 2012;15:230-238
18. Johnson CJ, Weir HK, Fink AK, et al. Accuracy of Cancer Mortality Study G. The impact of national death index linkages on population-based cancer survival rates in the united states. *Cancer Epidemiology*. 2013;37:20-28
19. Khoury MJ, Lam TK, Ioannidis JP, et al. Transforming epidemiology for 21st century medicine and public health. *Cancer Epidemiology, Biomarkers & Prevention*. 2013;22:508-516
20. Cox DR, Oakes D. *Analysis of survival data*. CRC Press; 1984.
21. Cortes C, Vapnik V. Support vector machine. *Machine learning*. 1995;20:273-297
22. Lin H-T, Lin C-J, Weng RC. A note on platt's probabilistic outputs for support vector machines. *Mach. Learn*. 2007;68:267-276
23. Politis D, Romano J, Wolf M. *Subsampling*. Springer-Verlag, New York; 1999.
24. Friedman J, Hastie T, Tibshirani R. Regularization paths for generalized linear models via coordinate descent. *Journal of statistical software*. 2010;33:1
25. Hastie T, Tibshirani R, Friedman J, et al. The elements of statistical learning: Data mining, inference and prediction. *The Mathematical Intelligencer*. 2005;27:83-85
26. Chen HC, Kodell RL, Cheng KF, et al. Assessment of performance of survival prediction models for cancer prognosis. *BMC Medical Research Methodology*. 2012;12:102
27. Chen HC, Chen JJ. Assessment of reproducibility of cancer survival risk predictions across medical centers. *BMC Medical Research Methodology*. 2013;13:25

**Table 1: ECO variables used for survival prediction**

---

**patient demographics**

post code  
Gender  
Age

**tumour characteristics**

primary site (in ICD-10 code)  
tumour stream  
morphology (in ICD-O-3 code)  
histologic grade  
metastatic sites  
most valid basis of diagnosis  
performance status diagnosis  
stage basis (pathological or clinical)  
stage (TNM)  
tumour size  
nodes taken  
positive nodes

**breast cancer related variables**

oestrogen receptor  
progesterone receptor  
human epidermal growth factor receptor 2 (HER2)

---

**Table 2: Characteristics of Derivation and Validation Cohorts**

|                      | Cohort 1: ECO         |                      | Cohort 2: ECO and EAR<br>(n=664) |
|----------------------|-----------------------|----------------------|----------------------------------|
|                      | Derivation<br>(n=869) | Validation<br>(n=94) |                                  |
| <b>Age (SD)</b>      | 67.6 (14.6)           | 68.4 (13.6)          | 66.3(14.9)                       |
| <b>Gender: Males</b> | 487 *                 | 48                   | 381                              |
| <b>Tumour stream</b> |                       |                      |                                  |
| Genitourinary        | 172                   | 21                   | 135                              |
| Colorectal           | 140                   | 14                   | 115                              |
| Lung                 | 121                   | 18                   | 96                               |
| Breast               | 122                   | 15                   | 74                               |
| Haematological       | 99                    | 7                    | 85                               |
| Upper gastro         | 83                    | 9                    | 57                               |
| Skin                 | 36                    | 1                    | 28                               |
| Head and Neck        | 35                    | 0                    | 30                               |
| Gynaecological       | 19                    | 4                    | 17                               |
| CNS                  | 15                    | 1                    | 9                                |

---

|                 |    |   |    |
|-----------------|----|---|----|
| Unknown primary | 38 | 9 | 26 |
|-----------------|----|---|----|

---

\*2 unspecified

For peer review only



1  
2  
3  
4  
5  
6  
7  
8  
9  
10  
11  
12  
13  
14  
15  
16  
17  
18  
19  
20  
21  
22  
23  
24  
25  
26  
27  
28  
29  
30  
31  
32  
33  
34  
35  
36  
37  
38  
39  
40  
41  
42  
43  
44  
45  
46  
47  
48  
49  
50  
51  
52  
53  
54  
55  
56  
57  
58  
59  
60

**Table 3: Performance of survival prediction: comparison between machine learning method and clinicians**

| Survival Period | AUC (95% CI)      |                        |
|-----------------|-------------------|------------------------|
|                 | Clinician panel   | Machine learning model |
| <b>6 months</b> | 0.79 (0.76, 0.81) | 0.87 (0.85, 0.89)      |
| <b>1 year</b>   | 0.79 (0.76, 0.81) | 0.80 (0.77, 0.82)      |
| <b>2 years</b>  | 0.75 (0.73, 0.78) | 0.76 (0.74, 0.79)      |

For peer review only

**Table 4: Prediction performance of machine learning algorithms: 6-month survival**

| Cancer type            | Area Under ROC Curve (95% CI) |                             |                               |
|------------------------|-------------------------------|-----------------------------|-------------------------------|
|                        | EAR only                      | ECO only                    | EAR + ECO                     |
| <b>Genitourinary</b>   | ·81 (.77, .85)                | ·82 (.78, .86)              | ·88 (.85, .91) <sup>*,†</sup> |
| <b>Colorectal</b>      | ·84 (.80, .88)                | ·85 (.81, .89)              | ·88 (.84, .91) <sup>*,†</sup> |
| <b>Lung</b>            | ·71 (.67, .76)                | ·73 (.69, .77) <sup>*</sup> | ·77 (.73, .82) <sup>*,†</sup> |
| <b>Breast</b>          | no deaths in the period       |                             |                               |
| <b>Haematological</b>  | ·73 (.68, .79)                | ·74 (.69, .79)              | ·76 (.71, .81)                |
| <b>Upper gastro</b>    | ·74 (.69, .78)                | ·64 (.60, .69)              | ·84 (.80, .87) <sup>†</sup>   |
| <b>Skin</b>            | ·84 (.77, .90)                | ·85 (.79, .91)              | ·91 (.86, .96) <sup>*,†</sup> |
| <b>Head and neck</b>   | ·66 (.61, .71)                | ·70 (.64, .75)              | ·77 (.72, .82) <sup>*,†</sup> |
| <b>Gynaecological</b>  | ·97 (.94, .99)                | ·99 (.98, 1.0) <sup>*</sup> | 1.0 (.99, 1.0) <sup>*</sup>   |
| <b>CNS</b>             | ·89 (.85, .94)                | ·84 (.78, 0.90)             | ·82 (.77, .88)                |
| <b>Unknown primary</b> | ·92 (.89, .95)                | ·79 (.75, .84)              | ·90 (.87, .93) <sup>*,†</sup> |

<sup>\*</sup>Significantly greater than *EAR only*. <sup>†</sup>Significantly greater than *ECO only*.

Table 5: Prediction performance of machine learning algorithms: 12-month survival

| Cancer type     | Area Under ROC Curve (95% CI) |                             |                               |
|-----------------|-------------------------------|-----------------------------|-------------------------------|
|                 | EAR only                      | ECO only                    | EAR + ECO                     |
| Genitourinary   | ·79 (·75, ·83)                | ·79 (·75, ·83)              | ·84 (·80, ·87) <sup>*,†</sup> |
| Colorectal      | ·82 (·78, ·86)                | ·83 (·79, ·86)              | ·87 (·83, ·90) <sup>*,†</sup> |
| Lung            | ·73 (·69, ·77)                | ·78 (·73, ·82) <sup>*</sup> | ·82 (·78, ·86) <sup>*,†</sup> |
| Breast          | ·71 (·65, ·78)                | ·90 (·86, ·94)              | ·92 (·89, ·96) <sup>*</sup>   |
| Haematological  | ·63 (·59, ·68)                | ·70 (·66, ·75) <sup>*</sup> | ·69 (·64, ·74) <sup>*</sup>   |
| Upper gastro    | ·62 (·57, ·66)                | ·70 (·65, ·74) <sup>*</sup> | ·72 (·68, ·76) <sup>*</sup>   |
| Skin            | ·76 (·71, ·88)                | ·89 (·85, ·93) <sup>*</sup> | ·93 (·90, ·96) <sup>*</sup>   |
| Head and neck   | ·77 (·73, ·88)                | ·68 (·63, 73)               | ·79 (·75, ·84) <sup>†</sup>   |
| Gynaecological  | ·95 (·92, ·97)                | 1·0 (1·0, 1·0) <sup>*</sup> | ·99 (·98, 1·0) <sup>*</sup>   |
| CNS             | ·66 (·58, ·73)                | ·68 (·61, ·76)              | ·69 (·63, ·76)                |
| Unknown primary | ·87 (·84, ·91)                | ·81 (·77, ·85)              | ·88 (·84, ·91)                |

<sup>\*</sup>Significantly greater than *EAR only*. <sup>†</sup>Significantly greater than *ECO only*.

Table 6: Prediction performance of machine learning algorithms: 24-month survival

| Cancer type     | Area Under ROC Curve (AUC) |                  |                    |
|-----------------|----------------------------|------------------|--------------------|
|                 | EAR only                   | ECO only         | EAR + ECO          |
| Genitourinary   | .73 (.69, .78)             | .84 (.81, .88) * | .86 (.82, .89) *,† |
| Colorectal      | .76 (.72, .80)             | .76 (.72, .80)   | .76 (.72, .80)     |
| Lung            | .74 (.69, .78)             | .78 (.73, .82) * | .82 (.79, .86) *,† |
| Breast          | .67 (.61, .73)             | .86 (.82, .90) * | .88 (.84, .92) *   |
| Haematological  | .73 (.68, .77)             | .70 (.66, .75)   | .80 (.76, .84) *,† |
| Upper gastro    | .81 (.77, .85)             | .77 (.72, .81)   | .87 (.83, .90) *,† |
| Skin            | .71 (.65, .76)             | .85 (.80, .89) * | .94 (.92, .97) *,† |
| Head and neck   | .74 (.70, .78)             | .66 (.51, .61)   | .71 (.67, .76) †   |
| Gynaecological  | .96 (.94, .99)             | .99 (.98, 1.0) * | .97 (.95, .99)     |
| CNS             | .83 (.78, .89)             | .87 (.82, .93)   | .96 (.93, .99) *,† |
| Unknown primary | .74 (.70, .79)             | .78 (.74, .82) * | .80 (.76, .84) *   |

\*Significantly greater than *EAR only*. †Significantly greater than *ECO only*.

1  
2  
3 Machine-learning prediction of cancer survival: a retrospective study  
4  
5  
6 using electronic administrative records and a cancer registry  
7  
8  
9  
10

11 Sunil Gupta<sup>1</sup>, Truyen Tran<sup>1,2</sup>, Wei Luo<sup>1</sup>, Dinh Phung<sup>1</sup>, Richard Lee Kennedy<sup>3</sup>, Adam Broad<sup>4</sup>,  
12 David Campbell<sup>4</sup>, David Kipp<sup>4</sup>, Madhu Singh<sup>4</sup>, Mustafa Khasraw<sup>3,4</sup>, Leigh Matheson<sup>5</sup>, David  
13 M Ashley<sup>3,4,5</sup>, Svetha Venkatesh<sup>1\*</sup>  
14  
15  
16  
17  
18  
19

20  
21 <sup>1</sup>Centre for Pattern Recognition and Data Analytics, Deakin University, Geelong, Victoria,  
22 Australia  
23

24  
25  
26 <sup>2</sup>Department of Computing, Curtin University, Perth, Western Australia, Australia  
27

28  
29 <sup>3</sup>School of Medicine, Deakin University, Geelong, Victoria, Australia  
30

31  
32 <sup>4</sup>Andrew Love Cancer Centre, Barwon Health, Geelong, Victoria, Australia  
33

34  
35 <sup>5</sup>Barwon Southwest Integrated Cancer Service, Geelong, Victoria, Australia  
36

37 \*Correspondence to: Svetha Venkatesh, Centre for Pattern Recognition and Data Analytics,  
38 Deakin University, Geelong, Victoria, Australia 3220 [svetha.venkatesh@deakin.edu.au](mailto:svetha.venkatesh@deakin.edu.au)  
39

40  
41 Telephone: +61 3 5227 2905 Fax: +61 3 5227 2028  
42

43  
44 Total Number of Text Pages: 24  
45

46  
47 Total Number of Tables: 6  
48

49  
50 Total Number of Illustrations: 0  
51  
52  
53  
54  
55  
56  
57  
58  
59  
60

1  
2  
3 Acknowledgements: The authors have no financial disclosures, conflicts of interest, or  
4  
5 external funding sources to claim.  
6

7 Abstract word count: 293  
8

9  
10 Word count: 4,680  
11

12  
13  
14  
15  
16 *Keywords: Cancer; Survival; Prediction; Machine learning; Electronic medical record*  
17  
18  
19  
20  
21  
22  
23  
24  
25  
26  
27  
28  
29  
30  
31  
32  
33  
34  
35  
36  
37  
38  
39  
40  
41  
42  
43  
44  
45  
46  
47  
48  
49  
50  
51  
52  
53  
54  
55  
56  
57  
58  
59  
60

**Abstract**

*Objectives:* Using the prediction of cancer outcome as a model, we have tested the hypothesis that through analysing routinely collected digital data contained in an electronic administrative record (EAR), using machine learning techniques, we could enhance conventional methods in predicting clinical outcomes.

*Setting:* A regional cancer centre in Australia.

*Participants:* Disease specific data from a purpose built cancer registry (ECO) from 869 patients was used to predict survival at 6, 12, and 24 months. The model was validated with data from a further 94 patients, and results compared to assessment of five specialist oncologists. Machine-learning prediction using ECO data was compared with that using EAR and a model combining ECO and EAR data.

*Primary and secondary outcome measures:* Survival prediction accuracy in terms of the area of the ROC curve.

*Results:* The ECO model yielded AUCs of 0·87 (95% CI=0·848–0·890) at six months, 0·796 (95% CI=0·774–0·823) at 12 months, and 0·764 (95% CI=0·737–0·789) at 24 months. Each was slightly better than the performance of the clinician panel. The model performed consistently across a range of cancers, including rare cancers. Combining ECO and EAR data yielded better prediction than the ECO-based model (AUCs ranging from 0·757 to 0·997 for 6 months, AUCs from 0·689 to 0·988 for 12 months, and AUCS from 0·713 to 0·973 for 24

1  
2  
3 months). The best prediction was for genitourinary, head and neck, lung, skin and upper  
4  
5 gastrointestinal tumours.  
6  
7

8  
9 *Conclusion:* Machine learning applied to information from a disease specific (cancer)  
10  
11 database and the EAR can be used to predict clinical outcomes. Importantly, the approach  
12  
13 described made use of a digital data that is already routinely collected but under-exploited  
14  
15 by clinical health systems.  
16  
17  
18  
19  
20  
21  
22  
23  
24  
25  
26  
27  
28  
29  
30  
31  
32  
33  
34  
35  
36  
37  
38  
39  
40  
41  
42  
43  
44  
45  
46  
47  
48  
49  
50  
51  
52  
53  
54  
55  
56  
57  
58  
59  
60



1  
2  
3 ***Strengths and limitations of this study***  
4

- 5 • This is the first study using machine learning of both administrative and registry data for  
6 cancer survival prediction.  
7
- 8 • A single prognosis model is produced across all cancers, improving prediction accuracy  
9 on rare cancers.  
10
- 11 • This is a retrospective study in a single centre.  
12  
13  
14  
15  
16  
17  
18  
19  
20  
21  
22  
23  
24  
25  
26  
27  
28  
29  
30  
31  
32  
33  
34  
35  
36  
37  
38  
39  
40  
41  
42  
43  
44  
45  
46  
47  
48  
49  
50  
51  
52  
53  
54  
55  
56  
57  
58  
59  
60

## Introduction

Over the past two decades there has been an explosion in the use of digital footprints to monitor and predict human behaviours. The source of data used for this purpose is our on-line use of the internet, the emails we send and transactions we make. Analysis of these footprints through machine learning techniques (MLT) have been exploited in the public domain by government and business to predict behaviours and inform investment decisions. In research MLT have also been used to analyse gene expression data,<sup>1, 2</sup> and for medical image analysis.<sup>3, 4</sup> However to date, there has been little exploration of these methodologies in the clinical setting. We hypothesised that MLT may offer a paradigm shift in clinical medicine that can address core issues with large and complex datasets. These techniques offer the potential to derive adaptive systems from diverse datasets, discover latent connections between data items, and to predict outcomes.

Most hospitals routinely collect large digital electronic administrative records (EAR). These are primarily used for organisational financial management. Historically, they have not been used extensively for clinical or research purposes. If these large data sets are able to be exploited using MLT it may open the way to optimise the use of collected administrative data to assist in predicting patients outcome, planning individualised patient care, monitoring resource utilisation, and improving institutional performance.<sup>5, 6</sup> The accurate assessment of comorbid status would improve assessment of prognosis and guide treatment decisions.<sup>7-10</sup> Other important information that may be contained or inferred

1  
2  
3 from an EAR includes geographical and demographic data, socioeconomic status, and  
4  
5 history of health care facility utilisation.<sup>2, 11, 12</sup>  
6  
7

8  
9 In this study, using cancer outcome prediction as a model, we wished to test the hypothesis  
10  
11 that routinely collected digital health data, if analysed by state of the art, validated, machine  
12  
13 learning techniques could be used to assist conventional tools in predicting clinical  
14  
15 outcomes.  
16

17  
18  
19 Accurate prediction of survival in patients with cancer remains a challenge due to the ever-  
20  
21 increasing heterogeneity and complexity of cancer, treatment options, and patient  
22  
23 populations. If achieved, reliable predictions could assist personalised care and treatment,  
24  
25 and improve institutional performance in cancer management. In current practice clinicians  
26  
27 use data collected at the bedside in consultations, medical records or purpose built cancer  
28  
29 registries to aid prognostication and decision making.  
30  
31

32  
33  
34 The notion of using MLT to predict cancer prognosis from clinical and pathological data is  
35  
36 not a new one.<sup>13, 14</sup> However, with the advent of more sophisticated and better validated  
37  
38 techniques, not only is more accurate prediction possible, but the range of data  
39  
40 incorporated into decision aids can be increased.<sup>15-17</sup> The need to improve cancer care  
41  
42 systems by creating linkages between registries and epidemiological surveillance through  
43  
44 analysis of complex and large clinical databases has recently been highlighted.<sup>18, 19</sup>  
45  
46  
47

48  
49 In this study we tested the capability of MLT to predict patient outcomes in a  
50  
51 heterogeneous cohort of cancer patients. We have interrogated two data sets: the first a  
52  
53

1  
2  
3 purpose-built cancer specific registry (ECO) containing demographic and tumour-related  
4  
5 data items according to an Australian nationally agreed protocol; the second a hospital  
6  
7 digital data set containing information about the patient's previous admissions and  
8  
9 presentations (EAR). Finally, in a test group of 94 patients, we examined the performance of  
10  
11 machine-learning methods in aiding a panel of expert clinicians in predicting patient  
12  
13 survival.  
14  
15  
16  
17  
18  
19  
20  
21  
22  
23  
24  
25  
26  
27  
28  
29  
30  
31  
32  
33  
34  
35  
36  
37  
38  
39  
40  
41  
42  
43  
44  
45  
46  
47  
48  
49  
50  
51  
52  
53  
54  
55  
56  
57  
58  
59  
60

For peer review only

## ***Patients and Methods***

### *Study design*

This is a retrospective study using the electronic administrative record (EAR) and a specialised cancer registry (ECO) from Barwon Health, the only public tertiary institution in a region of Australia with more than 350,000 residents. With a unified hospital identity number in use across the region, Barwon Health's EAR provides a single point of access for information on patient encounters with the health system, including hospitalizations, ED visits, medications, and treatments. In addition, the Andrew Love Cancer Centre at Barwon health has a specialised cancer registry called ECO, which captures clinical data for patients in the region. ECO records information on demographics, primary tumour and metastatic tumour, cancer stage, tumour size, lymph nodes, and breast tumour specific information. Treatment type, outcomes, including death, and recurrence information (primary and metastatic) are also recorded. Table 1 shows the variables used for survival prediction. The cohort for this study consists of 963 patients identified in ECO who were first diagnosed in year 2009. The study completion date was October 31, 2012; therefore all patients had at least 2 year and 10 months follow-up. Among these patients, 736 patients also had records in the EAR. Ethics approval was obtained from the Hospital and Research Ethics Committee at Barwon Health (number 12/83). Deakin University has reciprocal ethics authorization with Barwon Health.

### ***Analyses***

1  
2  
3 The analyses centred on predicting cancer survival since the date of diagnosis, defined as  
4 the date of tumour resection. Each patient was a unit of observation in the predictive  
5 problem: Patient data collected prior to the diagnosis date were used to construct the  
6 independent variables; Survival status in a period following the assessment was the  
7 dependent variable. Two analyses were performed: The first compared survival prediction  
8 made by machine learning models and the clinician panel, based on only information from  
9 ECO. The second analysis evaluated the added discriminative power provided by EAR, by  
10 comparing the best machine learning models using three sets of predicting variables:  
11 variables from ECO (Table 1), variables from EAR (appendix), and the union of the two.  
12  
13  
14  
15  
16  
17  
18  
19  
20  
21  
22  
23

24  
25 Although a survival analysis model (e.g., a proportional hazards model<sup>20</sup>) is commonly used  
26 in modelling risk factors, such models are not designed to predict events. In this study,  
27 survival was directly modelled using classification models to optimize prediction accuracy.  
28  
29  
30  
31  
32

### 33 *Comparing predictions by machine learning models and clinician*

34  
35 In the first analysis, all 963 patients in the ECO registry were randomly divided into a  
36 derivation cohort of 869 patients and a validation cohort of 94 patients (Table 2). To collect  
37 clinician prediction, patients in the validation cohort were assigned to a panel of five  
38 oncologists for survival prediction. For each patient, the oncologist was asked to estimate  
39 the survival probabilities based on the independent variables in Table 1. All clinicians  
40 estimated the patient's survival status by producing a probability for each of the three time  
41 periods—6 months, 1 year, and 2 years. When making this assessment the clinicians did not  
42 have knowledge of the treatment type offered or given to the patient. Three machine-  
43  
44  
45  
46  
47  
48  
49  
50  
51  
52  
53

1  
2  
3 learning models were trained on the derivation cohort using the same set of independent  
4  
5 variables, one for each prediction period. Each of the machine learning models was an  
6  
7 ensemble of 400 support vector machines<sup>21</sup> with linear kernel (i.e., the output of the model  
8  
9 was the average of 400 support-vector-machine outputs in Platt's a posteriori  
10  
11 probabilities<sup>22</sup>). Ensemble was used to control the variability introduced by L1 feature  
12  
13 selection. Each of the support vector machines was trained using a random 80%  
14  
15 subsampling (without replacement) of the derivation cohort.<sup>23</sup> The soft margin parameter  
16  
17 (C) of SVM was selected through cross-validation. Two measures were taken to improve the  
18  
19 training process. First, to compensate for the imbalance between the two outcomes (there  
20  
21 were more survivals than deaths), we oversampled the non-surviving cases by 50% in each  
22  
23 training subsample. Next, variable selection was performed through fitting a generalized  
24  
25 linear model with elastic net regularization<sup>24</sup> (alpha parameter set to 0.1 and lambda  
26  
27 parameter selected using 5-fold internal cross-validation) and variables with zero  
28  
29 coefficients were removed. After the machine learning models were constructed, they were  
30  
31 applied to predict survival probabilities for each patient in the validation cohort. Both the  
32  
33 clinician and model predictions were validated with the actual outcomes in the ECO registry.  
34  
35 Prediction performance was measured using the area under the ROC curve (AUC), also  
36  
37 known as the C-statistic.<sup>25</sup> 95% confidence intervals of AUCs were computed using 1000  
38  
39 bootstrap samples of validation cohort.  
40  
41  
42  
43  
44  
45  
46  
47  
48

49 *Comparing discriminative information from specialized registry and routine data*  
50  
51  
52  
53  
54  
55  
56  
57  
58  
59  
60

1  
2  
3 The second analysis compared the discriminative power of two data sources (ECO and EAR).  
4  
5 In this analysis, clinician predictions were not solicited. Among the 869 patients in the  
6  
7 derivation subset of Cohort 1, only 664 have records in the EAR and these patients were  
8  
9 included in the second analysis (Cohort 2, Table 2). Survival prediction models were derived  
10  
11 based on three sets of independent variables: 1) independent variables from EAR (EAR  
12  
13 only); 2) independent variables from ECO (ECO only); 3) the union of the two sets (*EAR +*  
14  
15 *ECO*). Similar to the previous analysis, the models were trained using 400 random  
16  
17 subsamples comprising 80% data of the cohort-2 and the modelling process was identical.  
18  
19  
20  
21 However, the models were evaluated not using the validation cohort. Instead, for each 80%  
22  
23 subsample, the remaining 20% was used to compute the AUC and its 95% confidence  
24  
25 interval.  
26  
27

28  
29  
30 The Wilcoxon rank-sum test was applied to answer the following comparison problems:  
31

- 32  
33 1. Does *ECO only* provide more discriminative power than *EAR only*?
- 34  
35 2. Does *EAR + ECO* provide more discriminative power than *EAR only*?
- 36  
37 3. Does *EAR + ECO* provide more discriminative power than *ECO only*?

38  
39  
40  
41 Details of the machine learning model and the predictor variables can be found in the  
42  
43 Appendix.  
44

## 45 46 47 48 **Results**



1  
2  
3 The cohorts for the two analyses are summarized in Table 2. The comparison between the  
4  
5 algorithmic predictions and the clinician predictions are summarized in Table 3. The model  
6  
7 had comparable performance to that of the clinicians, with the performance of the machine  
8  
9 learning model marginally better (AUC ranging from 0.76 to 0.87) than that of the clinicians  
10  
11 (AUC ranging from 0.75 to 0.79) for all three prediction periods. This similarity in accuracy  
12  
13 between algorithmic predictions and the clinician predictions was observed across different  
14  
15 cancer types. Consider the predictions for six-month survival. Out of 15 breast cancer cases,  
16  
17 the clinicians made 15 correct predictions and the algorithm made 14; Out of 18 lung cancer  
18  
19 cases, the clinicians made 13 correct predictions and the algorithm made 14; Out of 7  
20  
21 haematological cases, both the clinicians and the algorithm made all predictions correctly.  
22  
23 Similar results were observed on 12-month and 24-month survival predictions for different  
24  
25 cancers.  
26  
27  
28  
29  
30  
31

32 Prediction of 6-month survival using the three models is shown in Table 4. There were no  
33  
34 deaths from breast cancer during this period. Comparing the ECO model with the EAR  
35  
36 model, AUCs were comparable for colorectal, genitourinary, haematological, head and neck  
37  
38 and skin tumours. The EAR model was significantly better ( $p < 0.05$ ) for rare tumours; CNS,  
39  
40 upper gastrointestinal and unassigned primary source tumours. For each tumour type, the  
41  
42 model using both ECO and EAR data yielded similar or better performance to the models  
43  
44 using information from only one of the two databases. AUCs for the combined model  
45  
46 ranged from 0.76 to 1.0. The combined data model showed particularly improved  
47  
48  
49  
50  
51  
52  
53  
54  
55  
56  
57  
58  
59  
60

1  
2  
3 performance over ECO data (p value < .05) for all tumour streams except and breast and CNS  
4  
5 tumours.  
6  
7

8  
9 Data for 12-month survival prediction is shown in Table 5. Cancer-specific ECO data yielded  
10  
11 better prediction than EAR data (p < 0.05) for gynaecological, haematological lung, skin and  
12  
13 unknown primary cancers. Otherwise, ECO and EAR models yielded generally similar results.  
14  
15 The model using combined data performed better than EAR (p value < .05) for all tumour  
16  
17 streams other than CNS, head and neck and upper gastro tumours. The model using  
18  
19 combined data was better than (P < 0.05) ECO for all cancers except breast, CNS,  
20  
21 gynaecological and haematological cancers.  
22  
23  
24  
25

26 Table 6 shows data for 24-month survival prediction by the three models. The ECO model  
27  
28 yielded superior prediction (p value < .05) to the EAR model for breast, genitourinary,  
29  
30 gynaecological, lung, skin and unknown primary cancers, while the EAR model was superior  
31  
32 to the ECO model for haematological and head and neck tumours. Once more the model  
33  
34 that performed the best was that derived from both ECO and EAR data with AUCs ranging  
35  
36 from 0.71 to 0.97 across the range of cancers and particularly enhanced performance for all  
37  
38 cancers except breast, colorectal, gynaecological and unknown primary tumours compared  
39  
40 to the ECO. In summary, over all time periods, the performance of the combined model was  
41  
42 better than ECO (p < 0.05) for genitourinary, head and neck, lung, skin and upper  
43  
44 gastrointestinal tumours.  
45  
46  
47  
48  
49  
50  
51  
52  
53  
54  
55  
56  
57  
58  
59  
60

1  
2  
3 One of the key advantage of using machine learning technique is that it can combine the  
4  
5 large number of non-clinical factors with the few clinical risk factors. In this study, the model  
6  
7 selected most of the known clinical risk factors including *patient age, cancer staging,*  
8  
9 *performance status, and tumour size.* In addition it also found some useful non-clinical risk  
10  
11 *factors, including the type of the last hospital admission (emergency vs. elective), the*  
12  
13 *frequency of ED visits within the previous 3 months and 6 months (related to both cancer*  
14  
15 *and other medical conditions).*  
16  
17  
18  
19  
20  
21

## 22 **Discussion**

23  
24 In this study, using cancer outcome prediction as a model, we wished to test the hypothesis  
25  
26 that routinely collected digital health data, if analysed by MLT, could be used to assist  
27  
28 conventional tools in predicting clinical outcomes.  
29  
30

31  
32 Applying machine learning to data from the electronic administrative record (EAR) alone  
33  
34 predicted clinical outcomes with reasonable accuracy. Using the purpose built ECO data set,  
35  
36 the predictive tool also performed well across a broad range of cancer types, and in both  
37  
38 cases the predictive accuracies were at least as good as that of a panel of five expert  
39  
40 clinicians. Importantly a predictive tool derived from both the purpose built clinical registry  
41  
42 and administrative data had even greater predictive ability.  
43  
44  
45

46  
47 The wealth of administrative data contained in the EAR includes information on comorbid  
48  
49 conditions and previous clinic and hospital attendances as well as a drug history. There is  
50  
51  
52  
53  
54

1  
2  
3 considerable potential to use this data to improve clinical care across a spectrum of  
4  
5 diseases.<sup>5,6</sup>  
6  
7

8  
9 Most patients in the study were followed up for 3 years, which may not be adequate to  
10  
11 capture all oncologic outcomes, especially for those cancers with low mortality rate. We  
12

13  
14 have designed this study as retrospective and in a single centre; it will be of major interest  
15  
16 to observe how it performs in a variety of settings. The number of cases used to assess  
17  
18 performance of the models is relatively small. The strengths include the comparison of  
19  
20 machine learning tools with expert clinical opinion and the fact that very detailed and well-  
21  
22 validated data was available both directly related to the cancer and that contained in the  
23  
24 EAR. The generic nature of this approach makes it unnecessary to generate separate  
25  
26 predictive models for different types of cancer. This was a particular advantage for rarer  
27  
28 forms of cancer where predications using more conventional methods are very challenging.  
29  
30  
31

32  
33 Predictive tools derived from clinical data items have considerable potential to improve  
34  
35 clinical care, but must be suitably optimised and shown to perform equally well in diverse  
36  
37 clinical settings.<sup>26,27</sup> Clinical databases have become more widely available and increasingly  
38  
39 complex in recent years. The extent and complexity of data available to clinicians means  
40  
41 that novel approaches to managing data and supporting clinical decisions are needed.  
42  
43  
44 Machine learning approaches can not only cope with complex datasets, but also adapt in  
45  
46 real time and across different clinical settings.  
47  
48  
49  
50  
51  
52  
53  
54  
55  
56  
57  
58  
59  
60

1  
2  
3 The approach used in this study offers superior performance to previous machine learning  
4 approaches to predicting cancer survival.<sup>13-17</sup> Previous models have been derived for single  
5 cancer types, or for a limited range of cancers. The model described here performed well  
6 across a wide range of cancers. One advantage of this generic approach may be the ability  
7 to predict outcomes in less common cancers where limited data might preclude  
8 development of specific models. The fact that our model derived from administrative and  
9 cancer-related data performed slightly better than a panel of expert clinicians not only  
10 validates the potential utility of the model but suggests that it may be useful in assessing  
11 quality of care and also in settings where specialist care is not available. An alternative  
12 approach to borrow information across different cancer types is call multi-task learning. We  
13 are currently exploring this approach as well.

14  
15  
16  
17  
18  
19  
20  
21  
22  
23  
24  
25  
26  
27  
28  
29  
30 Clinical outcomes in any illness are determined not only by specific factors related to the  
31 illness itself but also by the patient's general state of health and by the presence of other  
32 chronic medical conditions often coded in an EAR if the individual traffics the health  
33 service.<sup>7-10</sup> As well, a particularly novel and important aspect of the use historical data from  
34 the EAR in machine learning is that it effectively captures the health care institutions current  
35 and previous performance. These data can be applied to any individual entering the system  
36 with a newly diagnosed cancer, as we have modelled here. As well they could also be used  
37 for quality and performance monitoring.

38  
39  
40  
41  
42  
43  
44  
45  
46  
47  
48  
49  
50 In conclusion, machine learning applied to information from a disease specific (cancer)  
51 database and the EAR can be used to predict outcomes. Improved prediction of outcome

1  
2  
3 has the potential to help clinicians make more meaningful decisions about treatment and to  
4  
5 assist with planning of future social and care needs. Most importantly, the approach  
6  
7 described makes use of digital data that is already routinely collected but under-exploited  
8  
9  
10 by clinical health systems.  
11  
12  
13  
14  
15  
16  
17  
18  
19  
20  
21  
22  
23  
24  
25  
26  
27  
28  
29  
30  
31  
32  
33  
34  
35  
36  
37  
38  
39  
40  
41  
42  
43  
44  
45  
46  
47  
48  
49  
50  
51  
52  
53  
54  
55  
56  
57  
58  
59  
60

For peer review only

## References

1. Zhao X, Rodland EA, Sorlie T, Naume B, Langerod A, Frigessi A, Kristensen VN, Borresen-Dale AL, Lingjaerde OC. Combining gene signatures improves prediction of breast cancer survival. *PLoS ONE [Electronic Resource]*. 2011;6:e17845
2. Chang CM, Su YC, Lai NS, Huang KY, Chien SH, Chang YH, Lian WC, Hsu TW, Lee CC. The combined effect of individual and neighborhood socioeconomic status on cancer survival rates. *PLoS ONE [Electronic Resource]*. 2012;7:e44325
3. Li C, Zhang S, Zhang H, Pang L, Lam K, Hui C, Zhang S. Using the k-nearest neighbor algorithm for the classification of lymph node metastasis in gastric cancer. *Computational & Mathematical Methods in Medicine*. 2012;2012:876545
4. Huang ML, Hung YH, Lee WM, Li RK, Wang TH. Usage of case-based reasoning, neural network and adaptive neuro-fuzzy inference system classification techniques in breast cancer dataset classification diagnosis. *Journal of Medical Systems*. 2012;36:407-414
5. Appari A, Eric Johnson M, Anthony DL. Meaningful use of electronic health record systems and process quality of care: Evidence from a panel data analysis of u.S. Acute-care hospitals. *Health Services Research*. 2013;48:354-375
6. Fitzhenry F, Murff HJ, Matheny ME, Gentry N, Fielstein EM, Brown SH, Reeves RM, Aronsky D, Elkin PL, Messina VP, Speroff T. Exploring the frontier of electronic health record surveillance: The case of postoperative complications. *Medical Care*. 2013;51:509-516
7. Lund L, Borre M, Jacobsen J, Sorensen HT, Norgaard M. Impact of comorbidity on survival of danish prostate cancer patients, 1995-2006: A population-based cohort study. *Urology*. 2008;72:1258-1262
8. Tetsche MS, Norgaard M, Jacobsen J, Wogelius P, Sorensen HT. Comorbidity and ovarian cancer survival in denmark, 1995-2005: A population-based cohort study. *International Journal of Gynecological Cancer*. 2008;18:421-427
9. Liefvers JR, Baracos VE, Winget M, Fassbender K. A comparison of charlson and elixhauser comorbidity measures to predict colorectal cancer survival using administrative health data. *Cancer*. 2011;117:1957-1965
10. Braithwaite D, Moore DH, Satariano WA, Kwan ML, Hiatt RA, Kroenke C, Caan BJ. Prognostic impact of comorbidity among long-term breast cancer survivors: Results from the lace study. *Cancer Epidemiology, Biomarkers & Prevention*. 2012;21:1115-1125
11. Jones LE, Doebbeling CC. Beyond the traditional prognostic indicators: The impact of primary care utilization on cancer survival. *Journal of Clinical Oncology*. 2007;25:5793-5799
12. Sant M, Minicozzi P, Allemani C, Cirilli C, Federico M, Capocaccia R, Budroni M, Candela P, Crocetti E, Falcini F, Ferretti S, Fusco M, Giacomini A, La Rosa F, Mangone L, Natali M, Leon MP, Traina A, Tumino R, Zamboni P. Regional inequalities in cancer care persist in italy and can influence survival. *Cancer Epidemiology*. 2012;36:541-547
13. Burke HB, Goodman PH, Rosen DB, Henson DE, Weinstein JN, Harrell FE, Jr., Marks JR, Winchester DP, Bostwick DG. Artificial neural networks improve the accuracy of cancer survival prediction. *Cancer*. 1997;79:857-862
14. Lundin M, Lundin J, Burke HB, Toikkanen S, Pylkkanen L, Joensuu H. Artificial neural networks applied to survival prediction in breast cancer. *Oncology*. 1999;57:281-286

15. Manilich EA, Kiran RP, Radivoyevitch T, Lavery I, Fazio VW, Remzi FH. A novel data-driven prognostic model for staging of colorectal cancer. *Journal of the American College of Surgeons*. 2011;213:579-588, 588.e571-572
16. Gao P, Zhou X, Wang ZN, Song YX, Tong LL, Xu YY, Yue ZY, Xu HM. Which is a more accurate predictor in colorectal survival analysis? Nine data mining algorithms vs. The tnm staging system. *PLoS ONE [Electronic Resource]*. 2012;7:e42015
17. Kim W, Kim KS, Lee JE, Noh DY, Kim SW, Jung YS, Park MY, Park RW. Development of novel breast cancer recurrence prediction model using support vector machine. *Journal of Breast Cancer*. 2012;15:230-238
18. Johnson CJ, Weir HK, Fink AK, German RR, Finch JL, Rycroft RK, Yin D, Accuracy of Cancer Mortality Study G. The impact of national death index linkages on population-based cancer survival rates in the united states. *Cancer Epidemiology*. 2013;37:20-28
19. Khoury MJ, Lam TK, Ioannidis JP, Hartge P, Spitz MR, Buring JE, Chanock SJ, Croyle RT, Goddard KA, Ginsburg GS, Herceg Z, Hiatt RA, Hoover RN, Hunter DJ, Kramer BS, Lauer MS, Meyerhardt JA, Olopade OI, Palmer JR, Sellers TA, Seminara D, Ransohoff DF, Rebbeck TR, Tourassi G, Winn DM, Zauber A, Schully SD. Transforming epidemiology for 21st century medicine and public health. *Cancer Epidemiology, Biomarkers & Prevention*. 2013;22:508-516
20. Cox DR, Oakes D. *Analysis of survival data*. CRC Press; 1984.
21. Cortes C, Vapnik V. Support vector machine. *Machine learning*. 1995;20:273-297
22. Lin H-T, Lin C-J, Weng RC. A note on platt's probabilistic outputs for support vector machines. *Mach. Learn*. 2007;68:267-276
23. Politis D, Romano J, Wolf M. *Subsampling*. Springer-Verlag, New York; 1999.
24. Friedman J, Hastie T, Tibshirani R. Regularization paths for generalized linear models via coordinate descent. *Journal of statistical software*. 2010;33:1
25. Hastie T, Tibshirani R, Friedman J, Franklin J. The elements of statistical learning: Data mining, inference and prediction. *The Mathematical Intelligencer*. 2005;27:83-85
26. Chen HC, Kodell RL, Cheng KF, Chen JJ. Assessment of performance of survival prediction models for cancer prognosis. *BMC Medical Research Methodology*. 2012;12:102
27. Chen HC, Chen JJ. Assessment of reproducibility of cancer survival risk predictions across medical centers. *BMC Medical Research Methodology*. 2013;13:25



1  
2  
3 **Table 1: ECO variables used for survival prediction**  
4  
5

---

6  
7 **patient demographics**

8  
9 post code  
10 Gender  
11 Age  
12

13 **tumour characteristics**

14  
15 primary site (in ICD-10 code)  
16 tumour stream  
17 morphology (in ICD-O-3 code)  
18 histologic grade  
19 metastatic sites  
20 most valid basis of diagnosis  
21 performance status diagnosis  
22 stage basis (pathological or clinical)  
23 stage (TNM)  
24 tumour size  
25 nodes taken  
26 positive nodes  
27  
28  
29

30 **breast cancer related variables**

31  
32 oestrogen receptor  
33 progesterone receptor  
34 human epidermal growth factor receptor 2 (HER2)  
35

---

**Table 2: Characteristics of Derivation and Validation Cohorts**

|                      | Cohort 1: ECO         |                      | Cohort 2: ECO and EAR<br>(n=664) |
|----------------------|-----------------------|----------------------|----------------------------------|
|                      | Derivation<br>(n=869) | Validation<br>(n=94) |                                  |
| <b>Age (SD)</b>      | 67.6 (14.6)           | 68.4 (13.6)          | 66.3(14.9)                       |
| <b>Gender: Males</b> | 487 *                 | 48                   | 381                              |
| <b>Tumour stream</b> |                       |                      |                                  |
| Genitourinary        | 172                   | 21                   | 135                              |
| Colorectal           | 140                   | 14                   | 115                              |
| Lung                 | 121                   | 18                   | 96                               |
| Breast               | 122                   | 15                   | 74                               |
| Haematological       | 99                    | 7                    | 85                               |
| Upper gastro         | 83                    | 9                    | 57                               |
| Skin                 | 36                    | 1                    | 28                               |
| Head and Neck        | 35                    | 0                    | 30                               |
| Gynaecological       | 19                    | 4                    | 17                               |
| CNS                  | 15                    | 1                    | 9                                |

1  
2  
3  
4  
5  
6  
7  
8  
9  
10  
11  
12  
13  
14  
15  
16  
17  
18  
19  
20  
21  
22  
23  
24  
25  
26  
27  
28  
29  
30  
31  
32  
33  
34  
35  
36  
37  
38  
39  
40  
41  
42  
43  
44  
45  
46  
47  
48  
49  
50  
51  
52  
53  
54  
55  
56  
57  
58  
59  
60

---

|                 |    |   |    |
|-----------------|----|---|----|
| Unknown primary | 38 | 9 | 26 |
|-----------------|----|---|----|

---

\*2 unspecified

For peer review only

**Table 3: Performance of survival prediction: comparison between machine learning method and clinicians**

| Survival Period | AUC (95% CI)      |                        |
|-----------------|-------------------|------------------------|
|                 | Clinician panel   | Machine learning model |
| <b>6 months</b> | 0.79 (0.76, 0.81) | 0.87 (0.85, 0.89)      |
| <b>1 year</b>   | 0.79 (0.76, 0.81) | 0.80 (0.77, 0.82)      |
| <b>2 years</b>  | 0.75 (0.73, 0.78) | 0.76 (0.74, 0.79)      |

Table 4: Prediction performance of machine learning algorithms: 6-month survival

| Cancer type     | Area Under ROC Curve (95% CI) |                             |                               |
|-----------------|-------------------------------|-----------------------------|-------------------------------|
|                 | EAR only                      | ECO only                    | EAR + ECO                     |
| Genitourinary   | ·81 (.77, .85)                | ·82 (.78, .86)              | ·88 (.85, .91) <sup>*,†</sup> |
| Colorectal      | ·84 (.80, .88)                | ·85 (.81, .89)              | ·88 (.84, .91) <sup>*,†</sup> |
| Lung            | ·71 (.67, .76)                | ·73 (.69, .77) <sup>*</sup> | ·77 (.73, .82) <sup>*,†</sup> |
| Breast          | no deaths in the period       |                             |                               |
| Haematological  | ·73 (.68, .79)                | ·74 (.69, .79)              | ·76 (.71, .81)                |
| Upper gastro    | ·74 (.69, .78)                | ·64 (.60, .69)              | ·84 (.80, .87) <sup>†</sup>   |
| Skin            | ·84 (.77, .90)                | ·85 (.79, .91)              | ·91 (.86, .96) <sup>*,†</sup> |
| Head and neck   | ·66 (.61, .71)                | ·70 (.64, .75)              | ·77 (.72, .82) <sup>*,†</sup> |
| Gynaecological  | ·97 (.94, .99)                | ·99 (.98, 1.0) <sup>*</sup> | 1.0 (.99, 1.0) <sup>*</sup>   |
| CNS             | ·89 (.85, .94)                | ·84 (.78, 0.90)             | ·82 (.77, .88)                |
| Unknown primary | ·92 (.89, .95)                | ·79 (.75, .84)              | ·90 (.87, .93) <sup>*,†</sup> |

<sup>\*</sup>Significantly greater than *EAR only*. <sup>†</sup>Significantly greater than *ECO only*.

Table 5: Prediction performance of machine learning algorithms: 12-month survival

| Cancer type     | Area Under ROC Curve (95% CI) |                             |                               |
|-----------------|-------------------------------|-----------------------------|-------------------------------|
|                 | EAR only                      | ECO only                    | EAR + ECO                     |
| Genitourinary   | ·79 (·75, ·83)                | ·79 (·75, ·83)              | ·84 (·80, ·87) <sup>*,†</sup> |
| Colorectal      | ·82 (·78, ·86)                | ·83 (·79, ·86)              | ·87 (·83, ·90) <sup>*,†</sup> |
| Lung            | ·73 (·69, ·77)                | ·78 (·73, ·82) <sup>*</sup> | ·82 (·78, ·86) <sup>*,†</sup> |
| Breast          | ·71 (·65, ·78)                | ·90 (·86, ·94)              | ·92 (·89, ·96) <sup>*</sup>   |
| Haematological  | ·63 (·59, ·68)                | ·70 (·66, ·75) <sup>*</sup> | ·69 (·64, ·74) <sup>*</sup>   |
| Upper gastro    | ·62 (·57, ·66)                | ·70 (·65, ·74) <sup>*</sup> | ·72 (·68, ·76) <sup>*</sup>   |
| Skin            | ·76 (·71, ·88)                | ·89 (·85, ·93) <sup>*</sup> | ·93 (·90, ·96) <sup>*</sup>   |
| Head and neck   | ·77 (·73, ·88)                | ·68 (·63, 73)               | ·79 (·75, ·84) <sup>†</sup>   |
| Gynaecological  | ·95 (·92, ·97)                | 1·0 (1·0, 1·0) <sup>*</sup> | ·99 (·98, 1·0) <sup>*</sup>   |
| CNS             | ·66 (·58, ·73)                | ·68 (·61, ·76)              | ·69 (·63, ·76)                |
| Unknown primary | ·87 (·84, ·91)                | ·81 (·77, ·85)              | ·88 (·84, ·91)                |

\*Significantly greater than *EAR only*. †Significantly greater than *ECO only*.

Table 6: Prediction performance of machine learning algorithms: 24-month survival

| Cancer type     | Area Under ROC Curve (AUC) |                  |                    |
|-----------------|----------------------------|------------------|--------------------|
|                 | EAR only                   | ECO only         | EAR + ECO          |
| Genitourinary   | .73 (.69, .78)             | .84 (.81, .88) * | .86 (.82, .89) *,† |
| Colorectal      | .76 (.72, .80)             | .76 (.72, .80)   | .76 (.72, .80)     |
| Lung            | .74 (.69, .78)             | .78 (.73, .82) * | .82 (.79, .86) *,† |
| Breast          | .67 (.61, .73)             | .86 (.82, .90) * | .88 (.84, .92) *   |
| Haematological  | .73 (.68, .77)             | .70 (.66, .75)   | .80 (.76, .84) *,† |
| Upper gastro    | .81 (.77, .85)             | .77 (.72, .81)   | .87 (.83, .90) *,† |
| Skin            | .71 (.65, .76)             | .85 (.80, .89) * | .94 (.92, .97) *,† |
| Head and neck   | .74 (.70, .78)             | .66 (.51, .61)   | .71 (.67, .76) †   |
| Gynaecological  | .96 (.94, .99)             | .99 (.98, 1.0) * | .97 (.95, .99)     |
| CNS             | .83 (.78, .89)             | .87 (.82, .93)   | .96 (.93, .99) *,† |
| Unknown primary | .74 (.70, .79)             | .78 (.74, .82) * | .80 (.76, .84) *   |

\*Significantly greater than *EAR only*. †Significantly greater than *ECO only*.

# Appendix

---

In this section we describe the procedure used to build our machine learning model.

## Derivation of the machine learning model

We used an ensemble of classifiers to achieve a low variance model. From the derivation cohort, data is randomly split to extract 80% for training (derivation train set) and 20% for testing (derivation test set). This is done by subsampling without replacement. This procedure is repeated 400 times to generate 400 random subsamples (or training/test pairs). The training sets were used to estimate an ensemble of classifiers while the test sets were used to assess the performance of these classifiers (mean Area under ROC curve and 95% CI).

For each training set subsample, a classification model was estimated using the derivation train set. Estimation of the classifier contains two phases: feature selection and classifier design. In *feature selection*, we used an established statistical technique - a generalized linear model with  $l_1$ -norm and  $l_2$ -norm penalty (alpha parameter set to 0.1 and lambda parameter selected using 5-fold internal cross-validation) [1]. Features with nonzero coefficients were selected. Next, using this feature set, the parameters of a *linear Support Vector machine* [2] classifier were estimated. For SVM implementation, we used the open source package LIBSVM [3].

The above procedure generates an ensemble of 400 classifiers to be tested against on the held-out validation cohort. Three such classifier-ensembles were built, one for each survival prediction tasks (i.e. prediction at 6, 12 and 24 months periods).



## Predictors for the machine learning models

Table 1 EMR-based predictors

### demographics

gender  
age  
spoken language  
country of origin  
religion  
occupation  
marital status  
insurance type

### cancer specific diagnoses

primary site  
tumor stream (e.g., breast)  
tumor  
morphology code  
topology code

### patient history (in the previous 1 month, 3 months, and 6 months)

number of inpatient admissions  
number of ED visits  
number of admissions from ED  
longest length of hospital stay  
average length of hospital stay  
number of operations  
number of oncology visits  
number of histology tests  
discharge diagnoses in ICD-10  
diagnosis-related groups codes  
procedure codes

1  
2  
3 **Table 2 ECO-based predictors.**  
4  
5

6 **patient demographics**  
7

8 Gender

9 Age  
10

11 **tumour characteristics**  
12

13 primary site (in ICD-10 code)

14 tumour stream

15 morphology (in ICD-O-3 code)

16 histologic grade

17 metastatic sites

18 most valid basis of diagnosis

19 performance status diagnosis

20 stage basis (pathological or clinical)

21 stage (TNM)

22 tumour size

23 nodes taken

24 positive nodes  
25  
26  
27

28 **breast cancer related variables**  
29

30 oestrogen receptor

31 progesterone receptor

32 human epidermal growth factor receptor 2 (HER2)  
33  
34  
35  
36  
37  
38  
39  
40  
41

42 **References**

- 43 1. Tibshirani R. Regression shrinkage and selection via the lasso. Journal of the Royal Statistical  
44 Society. Series B (Methodological) 1996;**58**(1):267-88
- 45 2. Cortes C, Vapnik V. Support vector machine. Machine learning 1995;**20**(3):273-97
- 46 3. Chang C-C, Lin C-J. LIBSVM: a library for support vector machines. ACM Transactions on Intelligent  
47 Systems and Technology (TIST) 2011;**2**(3):27  
48  
49  
50  
51  
52  
53  
54  
55  
56  
57  
58  
59  
60

**STARD checklist for reporting of studies of diagnostic accuracy**  
(version January 2003)

| Section and Topic           | Item # |                                                                                                                                                                                                                                                     | On page #     |
|-----------------------------|--------|-----------------------------------------------------------------------------------------------------------------------------------------------------------------------------------------------------------------------------------------------------|---------------|
| TITLE/ABSTRACT/<br>KEYWORDS | 1      | Identify the article as a study of diagnostic accuracy (recommend MeSH heading 'sensitivity and specificity').                                                                                                                                      | 1-4           |
| INTRODUCTION                | 2      | State the research questions or study aims, such as estimating diagnostic accuracy or comparing accuracy between tests or across participant groups.                                                                                                | 5-8           |
| <b>METHODS</b>              |        |                                                                                                                                                                                                                                                     |               |
| <i>Participants</i>         | 3      | The study population: The inclusion and exclusion criteria, setting and locations where data were collected.                                                                                                                                        | 9             |
|                             | 4      | Participant recruitment: Was recruitment based on presenting symptoms, results from previous tests, or the fact that the participants had received the index tests or the reference standard?                                                       | 9             |
|                             | 5      | Participant sampling: Was the study population a consecutive series of participants defined by the selection criteria in item 3 and 4? If not, specify how participants were further selected.                                                      | Yes           |
|                             | 6      | Data collection: Was data collection planned before the index test and reference standard were performed (prospective study) or after (retrospective study)?                                                                                        | retrospective |
| <i>Test methods</i>         | 7      | The reference standard and its rationale.                                                                                                                                                                                                           | 9-10          |
|                             | 8      | Technical specifications of material and methods involved including how and when measurements were taken, and/or cite references for index tests and reference standard.                                                                            | 9-10          |
|                             | 9      | Definition of and rationale for the units, cut-offs and/or categories of the results of the index tests and the reference standard.                                                                                                                 | 9-10          |
|                             | 10     | The number, training and expertise of the persons executing and reading the index tests and the reference standard.                                                                                                                                 | N/A           |
|                             | 11     | Whether or not the readers of the index tests and reference standard were blind (masked) to the results of the other test and describe any other clinical information available to the readers.                                                     | N/A           |
| <i>Statistical methods</i>  | 12     | Methods for calculating or comparing measures of diagnostic accuracy, and the statistical methods used to quantify uncertainty (e.g. 95% confidence intervals).                                                                                     | 10-12         |
|                             | 13     | Methods for calculating test reproducibility, if done.                                                                                                                                                                                              | 10-12         |
| <b>RESULTS</b>              |        |                                                                                                                                                                                                                                                     |               |
| <i>Participants</i>         | 14     | When study was performed, including beginning and end dates of recruitment.                                                                                                                                                                         | 9             |
|                             | 15     | Clinical and demographic characteristics of the study population (at least information on age, gender, spectrum of presenting symptoms).                                                                                                            | 21            |
|                             | 16     | The number of participants satisfying the criteria for inclusion who did or did not undergo the index tests and/or the reference standard; describe why participants failed to undergo either test (a flow diagram is strongly recommended).        | N/A           |
| <i>Test results</i>         | 17     | Time-interval between the index tests and the reference standard, and any treatment administered in between.                                                                                                                                        | N/A           |
|                             | 18     | Distribution of severity of disease (define criteria) in those with the target condition; other diagnoses in participants without the target condition.                                                                                             | N/A           |
|                             | 19     | A cross tabulation of the results of the index tests (including indeterminate and missing results) by the results of the reference standard; for continuous results, the distribution of the test results by the results of the reference standard. | N/A           |
|                             | 20     | Any adverse events from performing the index tests or the reference standard.                                                                                                                                                                       | N/A           |
| <i>Estimates</i>            | 21     | Estimates of diagnostic accuracy and measures of statistical uncertainty (e.g. 95% confidence intervals).                                                                                                                                           | 23-25         |
|                             | 22     | How indeterminate results, missing data and outliers of the index tests were handled.                                                                                                                                                               | N/A           |
|                             | 23     | Estimates of variability of diagnostic accuracy between subgroups of participants, readers or centers, if done.                                                                                                                                     | N/A           |
|                             | 24     | Estimates of test reproducibility, if done.                                                                                                                                                                                                         | N/A           |
| DISCUSSION                  | 25     | Discuss the clinical applicability of the study findings.                                                                                                                                                                                           | 15-17         |
